# Supplementary material for: Disorganized chromatin hierarchy and stem cell aging in a male patient of atypical laminopathy-based progeria mandibuloacral dysplasia type A
Source: PubMed Central journal article supplement — Nat Commun. 2024 Nov 20;15:10046. doi: 10.1038/s41467-024-54338-3 (PMC11579472; doi:10.1038/s41467-024-54338-3), 2024-11-20
Supplement: 41467_2024_54338_MOESM1_ESM.pdf [file 41467_2024_54338_MOESM1_ESM.pdf]

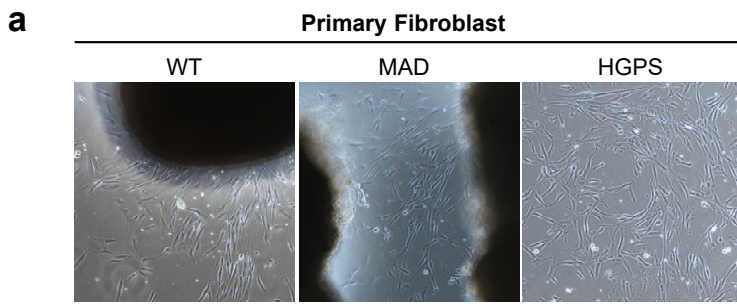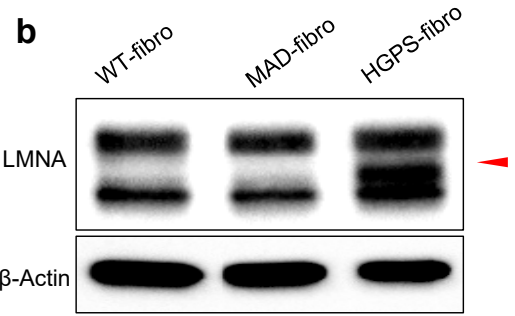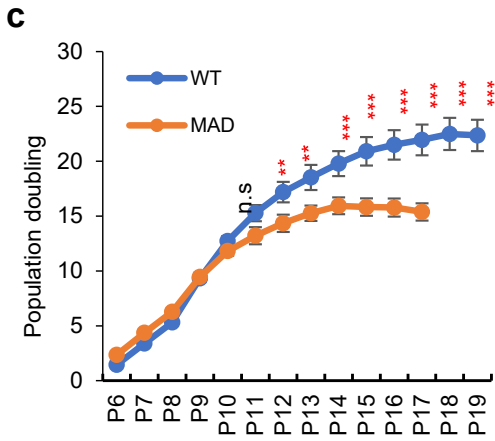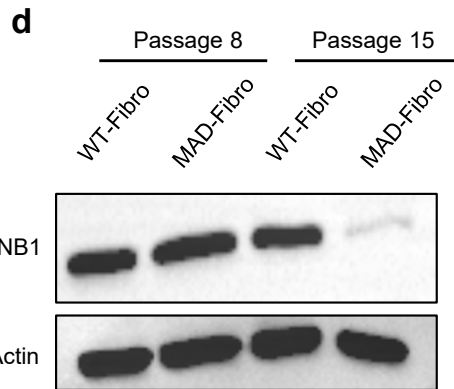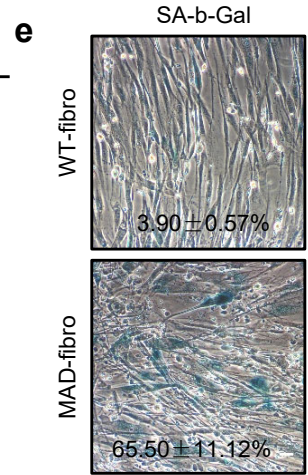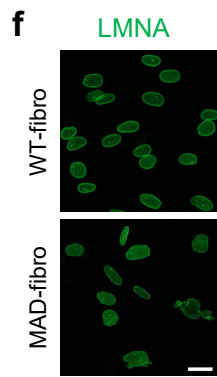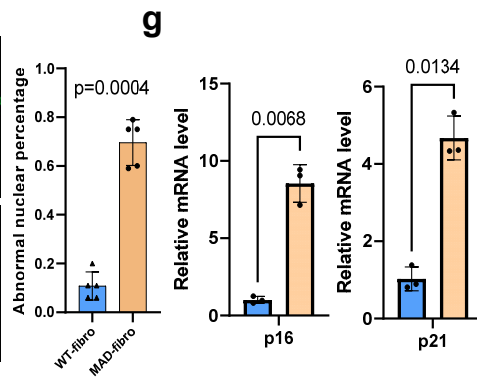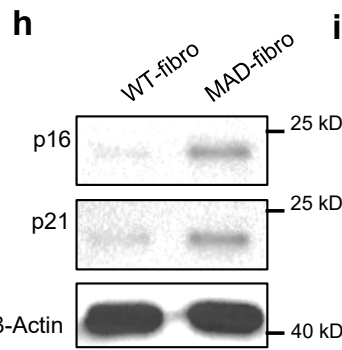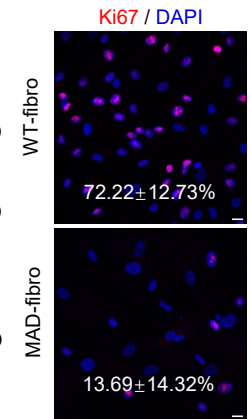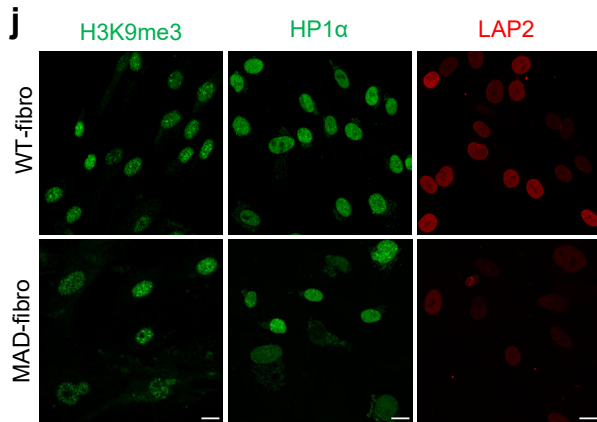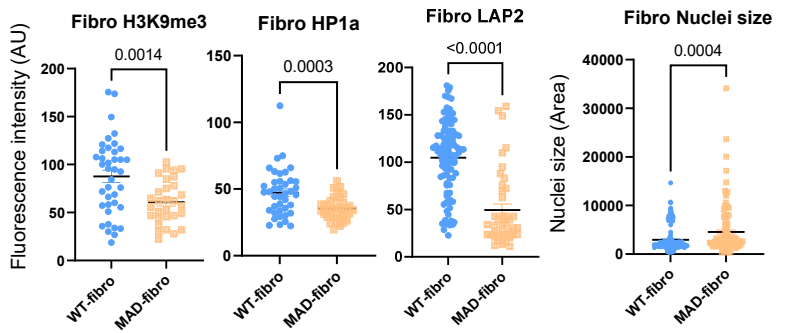

**Supplementary Fig. 1| MAD patient-derived fibroblasts exhibited premature senescence.**

a, Isolation of primary fibroblasts from normal, MAD and HGPS patients. The normal fibroblasts were labeled as WT. b, Immunoblotting of lamin A/C in primary fibroblasts from normal individual, MAD and HGPS patients. The red arrow indicated progerin.  $\beta$ -Actin served as the loading control. The results were repeated twice with similar results. c, Growth curve of MAD primary fibroblasts. Bars represent the mean  $\pm$  SD.; n = 3 independent biological replicates; \*\*p < 0.01, \*\*\*p < 0.001; n.s., non-significant; p value was calculated using two-way ANOVA test. d, Immunoblotting of lamin B1 in MAD primary fibroblasts during different passages (early passage p8 and late passage p15). The results were repeated twice with similar results. e, SA- $\beta$ -gal staining passage 15 of MAD primary fibroblasts, the labeled number indicates positive percentage; Scale bar 100  $\mu$ m. Data are mean  $\pm$  SD, the p value was calculated using two-tailed unpaired t-test, n = 3. Three biological replicates were performed with similar results. f, Immunostaining of lamin A/C (LMNA, green) in WT and MAD fibroblasts. DAPI, blue. Scale bar 10  $\mu$ m. Data represent the mean  $\pm$  SD, the p value was calculated using two-tailed unpaired t-test, n=5. Three biological replicates were performed with similar results. g, qPCR analysis of *p16* and *p21* using late passage fibroblasts. Data were normalized to *18S rDNA* and represent mean  $\pm$  SD, n=3 independent biological replicates; p values were calculated using a one-way analysis of variance (ANOVA). h, Immunoblotting of p16 and p21 using late passage fibroblasts. The results were repeated twice with similar results. i, Representative images of Ki67 staining (red) in WT and MAD-fibroblast. DAPI, blue. Scale bar 10  $\mu$ m. Data indicates the mean  $\pm$  SD, the p value was calculated using two-tailed unpaired t-test, n=3. Images were acquired from three independent biological replicates with similar results. j, Representative images of heterochromatin associated HP1a (green, n=40 WT and n=38 MAD), H3K9me3 (green, n=39 WT and n=30 MAD), LAP2 (red, n=99 WT and n=41 MAD) and nuclei size (n=178 WT and n=109 MAD). Scale bars 10  $\mu$ m. Images were acquired from three independent biological replicates with similar results. Fluorescence intensity was quantified and p values were calculated by unpaired two-tailed Student's t-test. Source data are provided as a Source Data file.

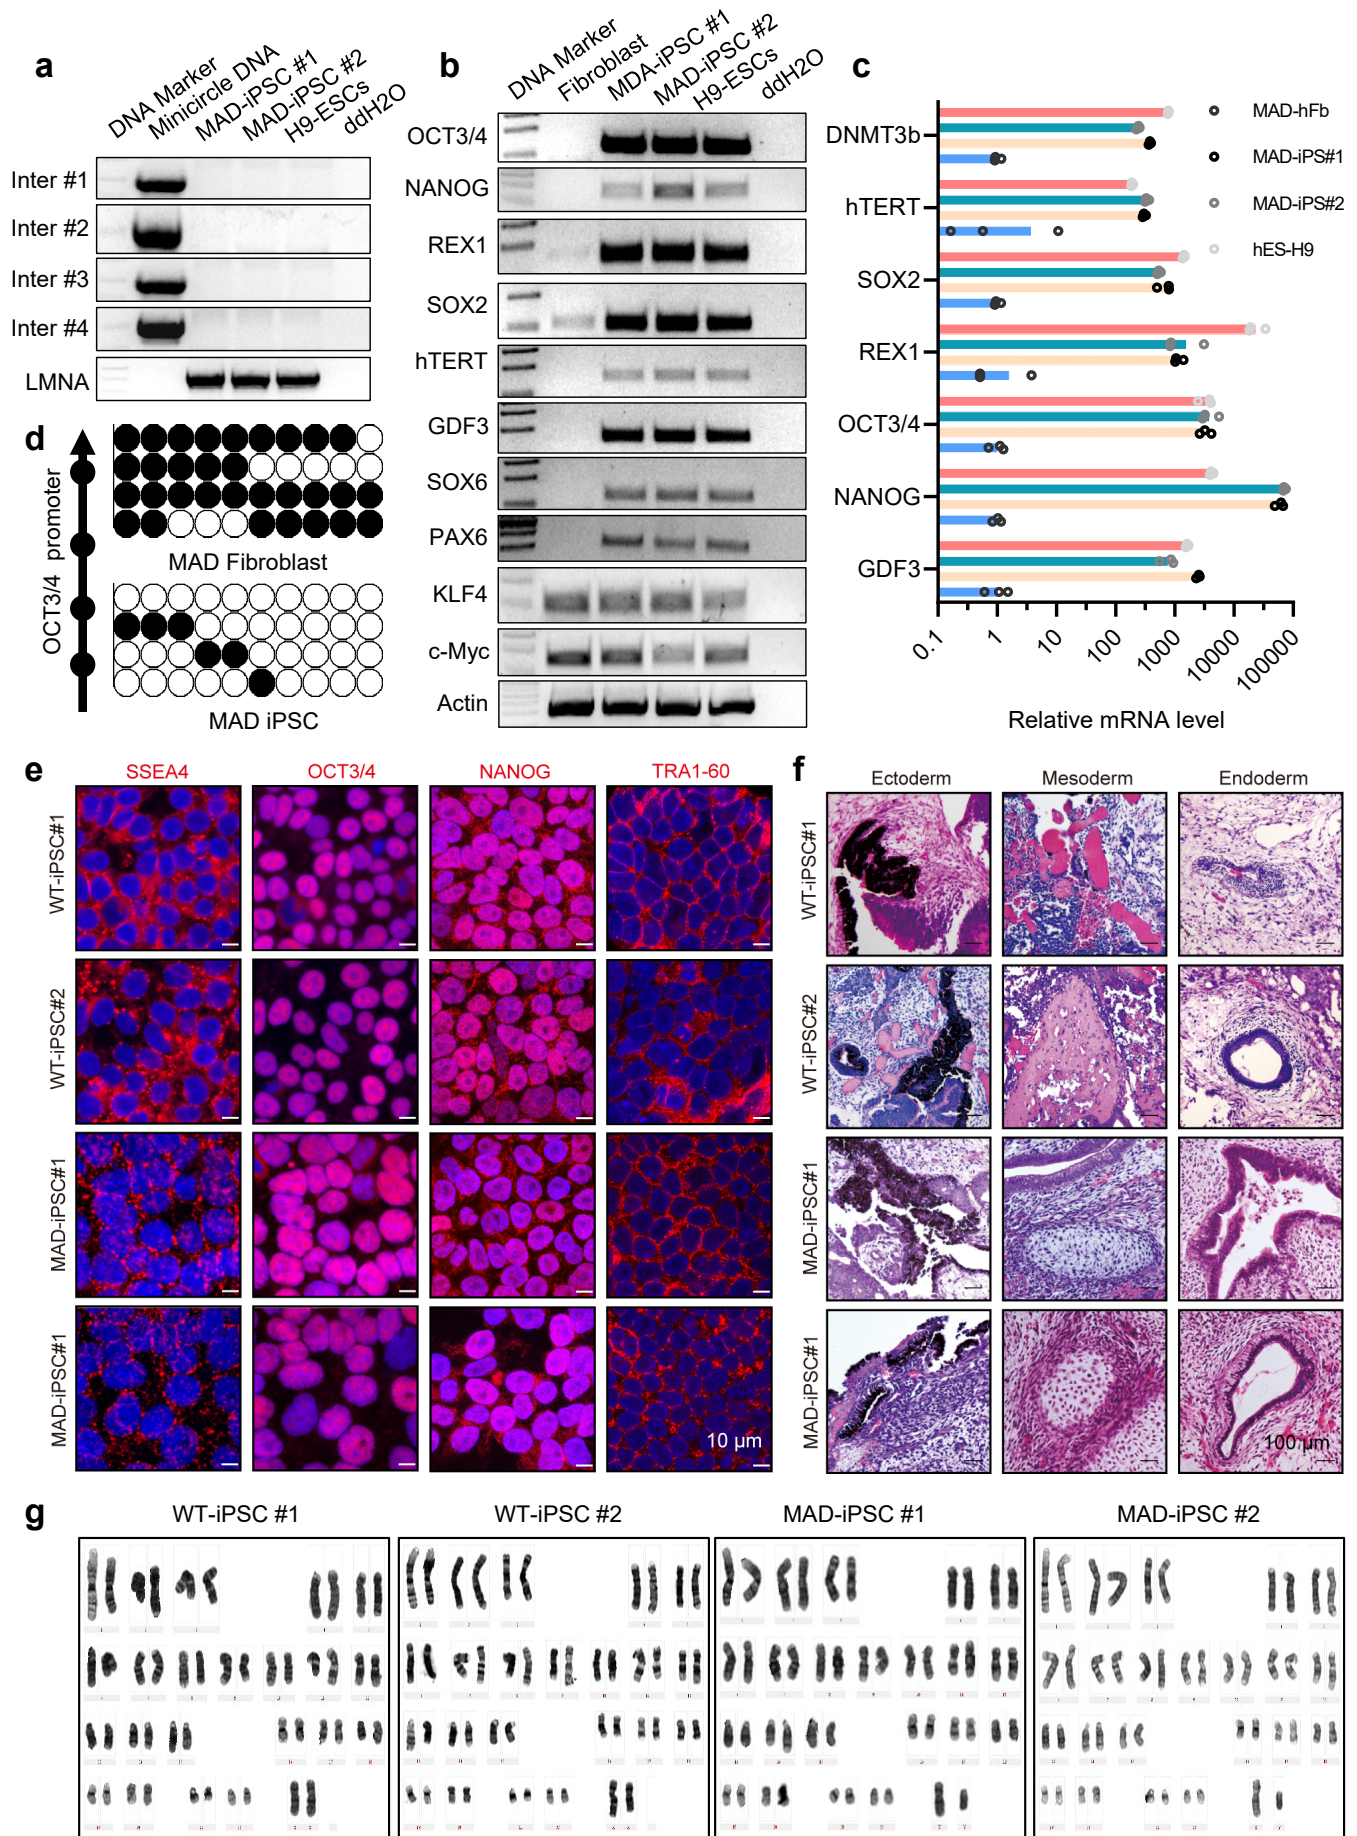

**Supplementary Fig. 2| Generation of induced pluripotent stem cells (iPSCs) from MAD fibroblasts via integration-free minicircle vector.** a, Examination of vector integration in WT and MAD-iPSCs clones with 4 pairs of primers flanking different regions. Minicircle DNA served as a positive control while H9-ESCs as a negative control. b, RT-PCR of pluripotency related genes in MAD iPSC and fibroblast cells. c, qPCR of pluripotency related genes in MAD-iPSCs and parental fibroblasts. H9 served as a positive control. Data were normalized to *GAPDH* and represent mean  $\pm$  SD, n=3 independent biological replicates. Three independent biological replicates were performed with similar results. d, Bisulfite sequencing of OCT3/4 promoter region in MAD fibroblasts and MAD-iPSCs#1. Blank and filled circle represent unmethylated and methylated CpGs, respectively. Each row of circles represents sequence result from a given amplicon and ten amplicons were sequenced and analyzed. e, Immunostaining of pluripotency associated markers in MAD-iPSCs, including SSEA-4 (red), NANOG (red), OCT3/4 (red) and TRA60-1 (red) in WT- and MAD-iPSCs. DAPI, blue. Scale bar 10  $\mu$ m. Three independent biological replicates were performed with similar results. f, Examination of three germ layers differentiation capability of WT- and MAD-iPSCs. Scale bar 100  $\mu$ m. Three biological replicates were performed with similar results. g, Representative M-phase karyotyping in WT- and MAD-iPSCs clones. Source data are provided as a Source Data file.

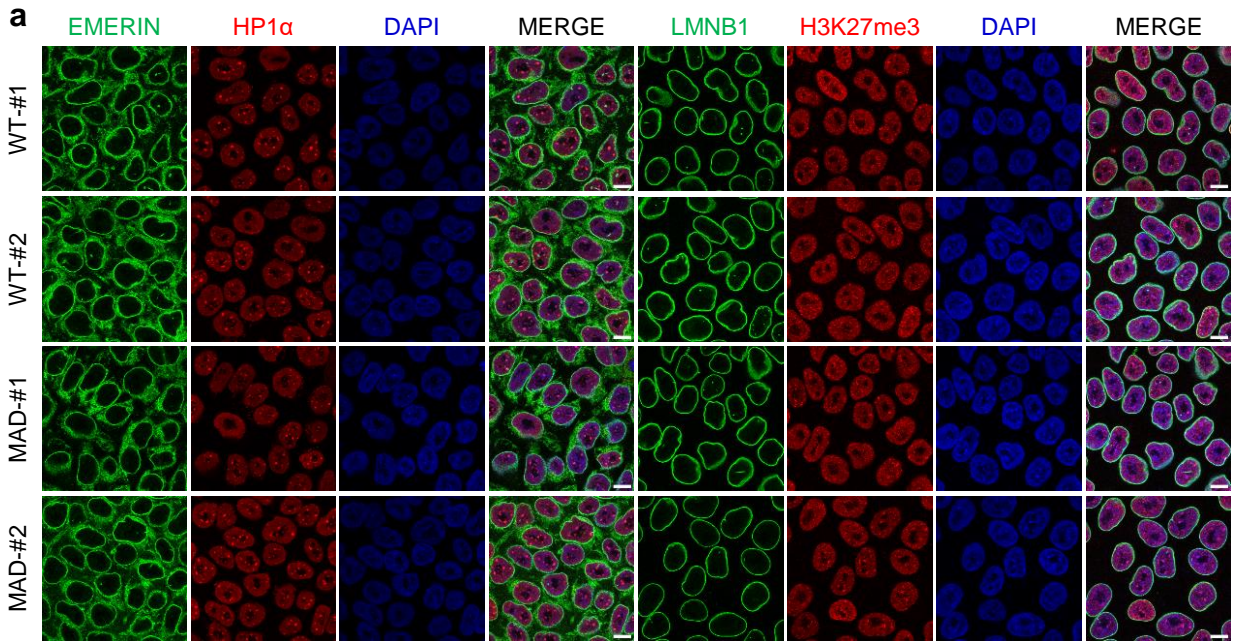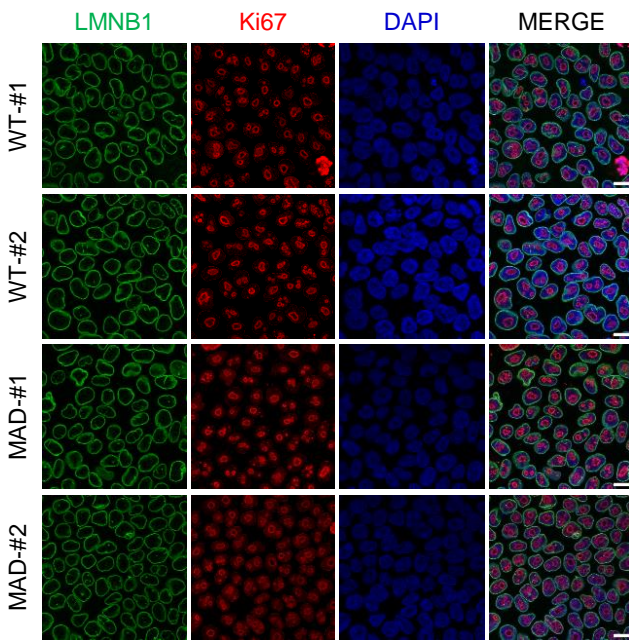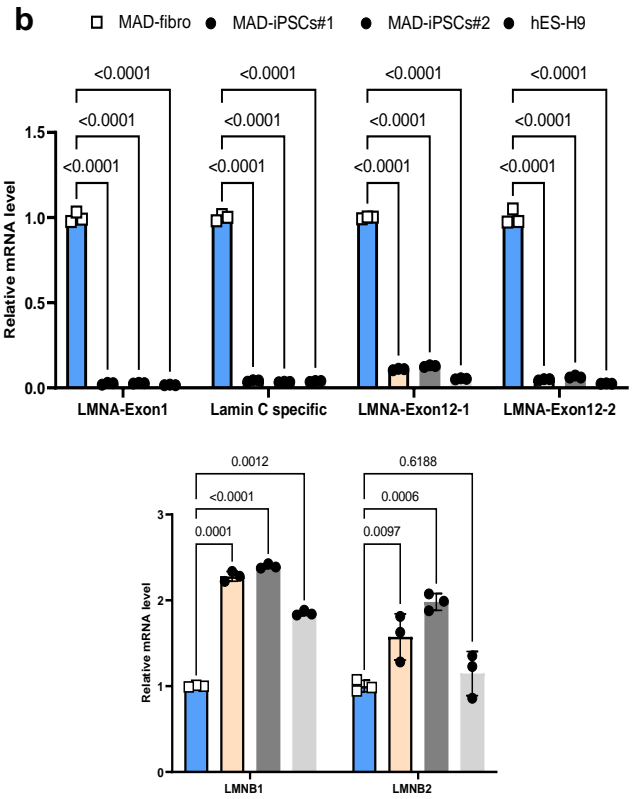

**Supplementary Fig. 3| Characterization of MAD-iPSCs.** a, Immunostaining of HP1a (red), EMERIN (green), lamin B1 (LMNB1, green) and H3K27me3 (red), lamin B1 (LMNB1, green) and Ki-67 (red) in iPSCs clones. DAPI, blue. Scale bar 10  $\mu$ m. Three independent biological replicates were performed with similar results. b, qPCR analysis of *LMNB1*, *LMNB2*, *Lamin A* and *Lamin C* in MAD-iPSCs. Gene expression levels were normalized to *GAPDH* and relative expressions of genes were plotted against that in fibroblasts. H9-ESCs served as control. Data represent mean  $\pm$  SD, n=3 independent samples; p values were calculated using one-way ANOVA coupled with Tukey's post hoc test. Three independent biological replicates were performed with similar results. Source data are provided as a Source Data file.

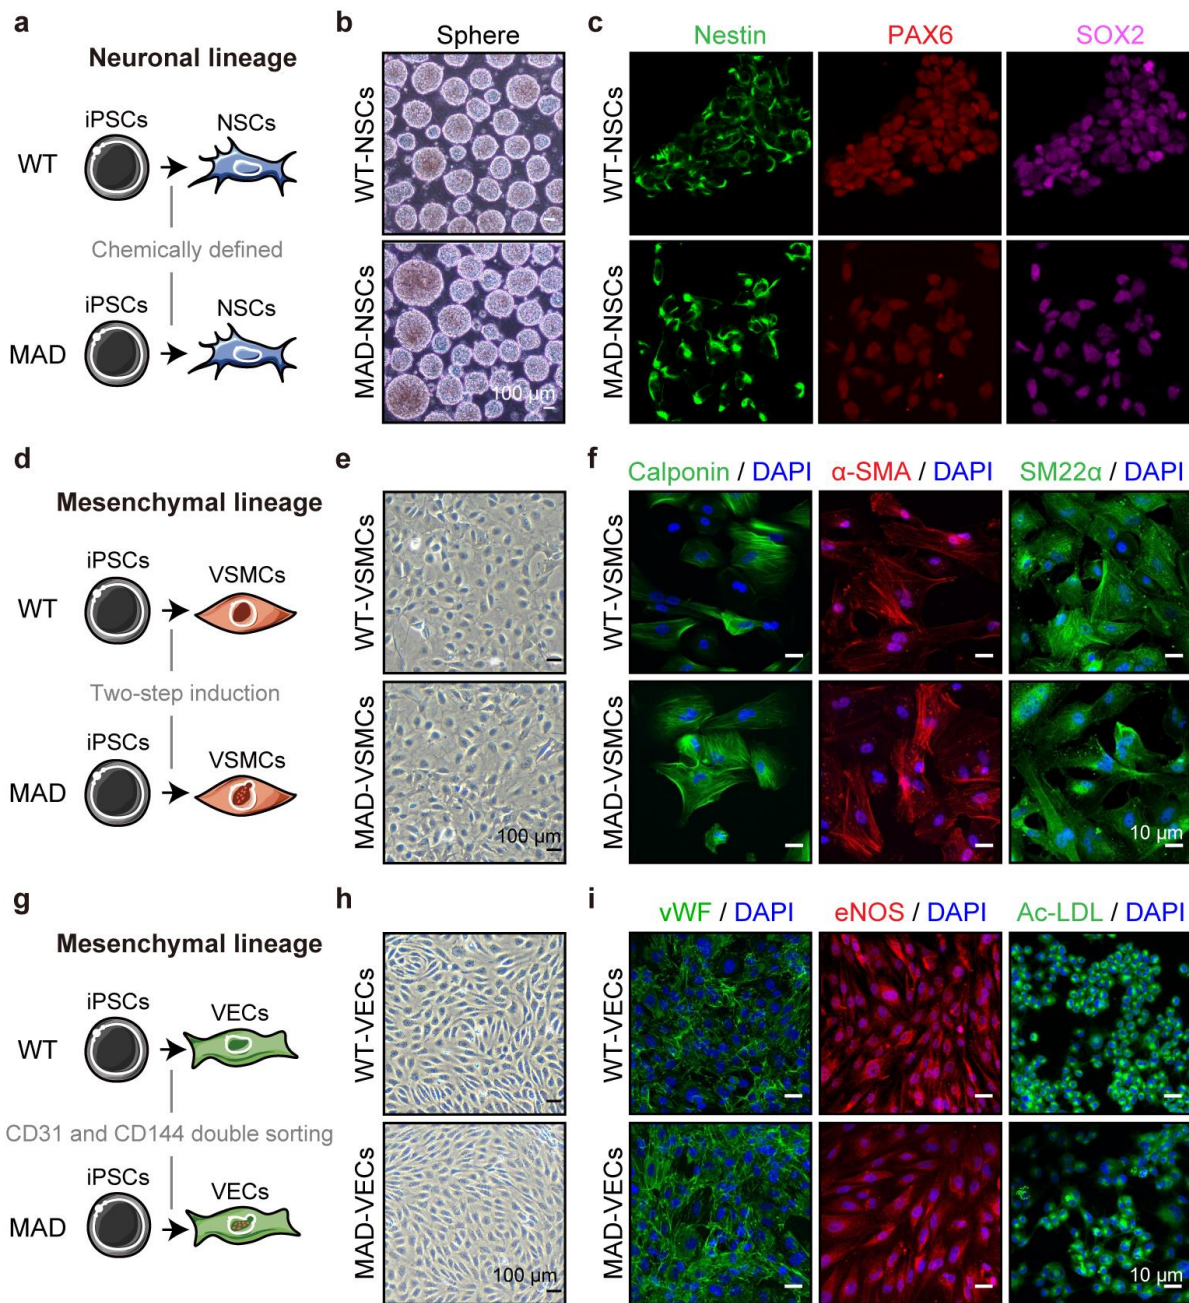

**j**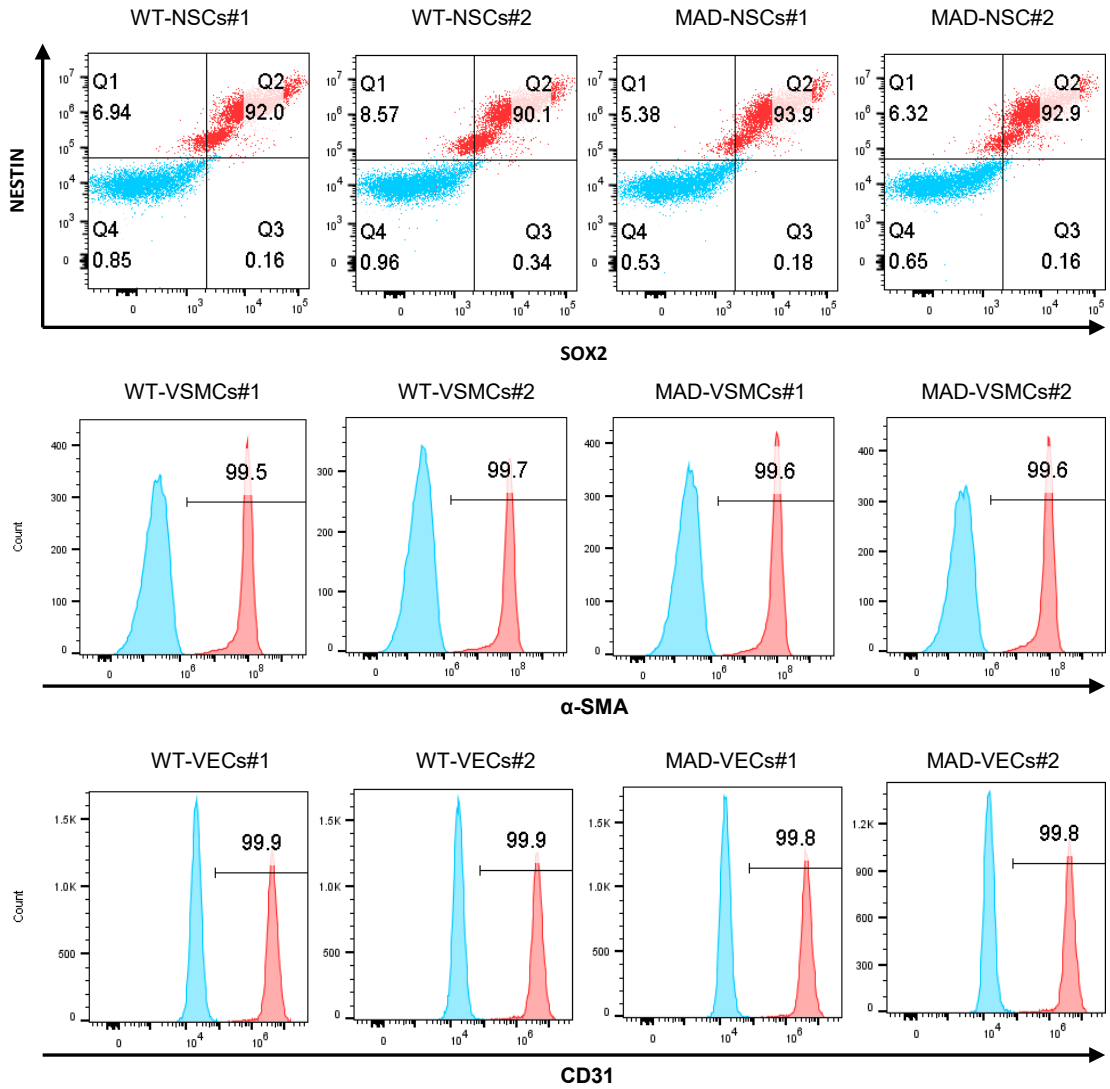



**Supplementary Fig. 4| Characterization of NSCs, VSMCs and VECs derived from MAD-iPSCs.** a, Schematic diagram of NSCs induction from iPSCs. b, Neural-spheres derived from WT-iPSCs and MAD-iPSCs. Scale bar 100  $\mu\text{m}$ . c, Co-immunostaining of NSCs specific markers, including NESTIN (green), PAX6 (red), SOX2 (pink) at passage 6. Scale bar 10  $\mu\text{m}$ . Three independent differentiations were performed with similar results. d, Schematic diagram of VSMCs from iPSCs. e. VSMCs derived from WT- and MAD-iPSCs. Scale bars, 100  $\mu\text{m}$ . f, Immunostaining of VSMCs specific markers, including Calponin (Green),  $\alpha$ -SMA (red), SM22  $\alpha$  (green) at passage 5. DAPI, blue. Scale bar 10 $\mu\text{m}$ . Three independent differentiations were performed with similar results. g-i, Schematic diagram of VECs induction from iPSCs. h, VECs derived from WT- and MAD-iPSCs with double selections of CD31/CD144. Scale bars, 100  $\mu\text{m}$ . i, Immunostaining of specific markers, including vWF (green), eNOS (red) and functional assay (Ac-LDL) of VECs derived from WT and MAD-iPSCs at passage 3. DAPI, blue. Scale bars, 10  $\mu\text{m}$ . Three independent biological differentiation were performed with similar results. j, Flow cytometry analysis of two iPSCs clone derived NSCs, VSMCs and VECs with corresponding antibodies (NESTIN and SOX2 for NSCs,  $\alpha$ -SMA for VSMCs and CD31 for VECs). Three independent differentiations were performed with similar results.

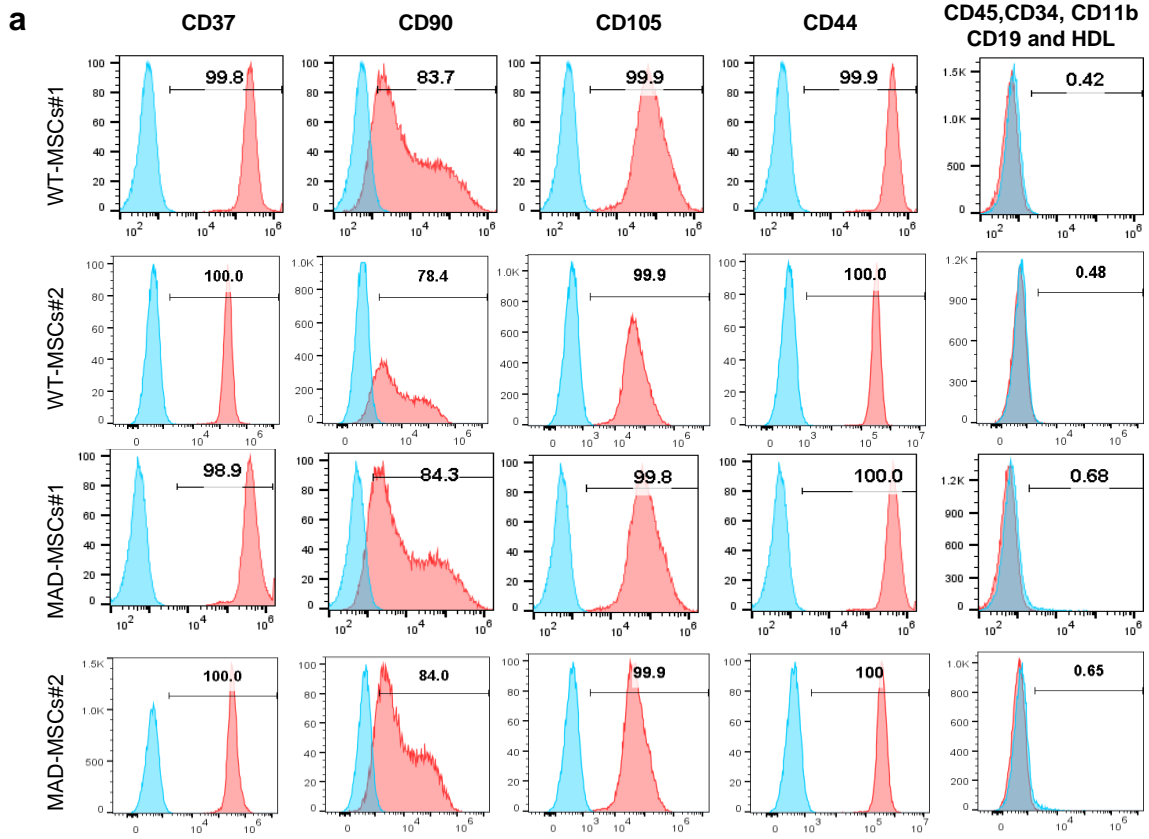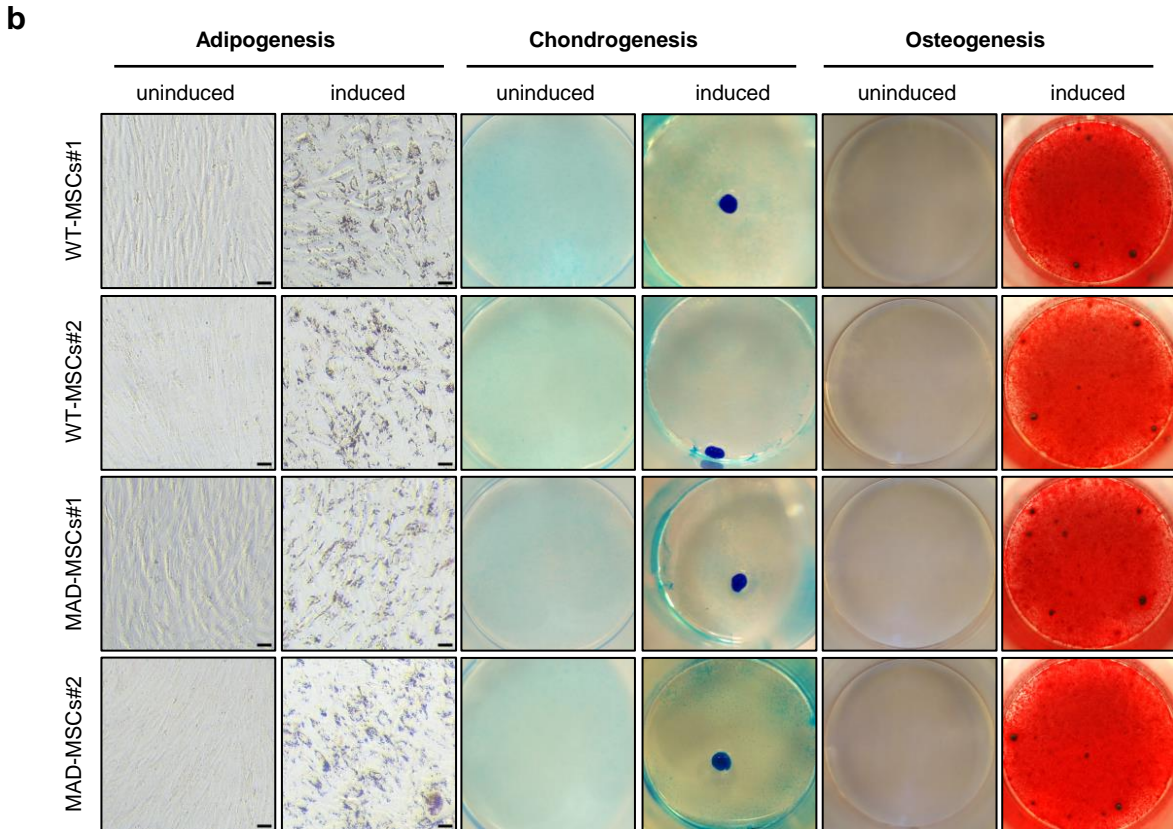

**Supplementary Fig. 5| MAD-iPSCs derived mesenchymal stem cells (MAD-MSCs) recapitulate accelerated aging.** a, Flow cytometry analyses of the surface markers in MSCs (P5 MSCs) derived from two iPSCs clones. Three independent differentiations were performed with similar results. b, iPSCs clones derived MSCs for trilineage differentiation. Adipogenesis, osteogenesis and chondrogenesis in WT- and MAD-MSCs (P5 MSCs) were examined by Oil red (Scale bars 200  $\mu\text{m}$ ), Alizarin red (Scale bars are 100  $\mu\text{m}$ ) and Alcian blue (Scale bars are 200  $\mu\text{m}$ ) staining. Three independent biological replicates were performed with similar results.

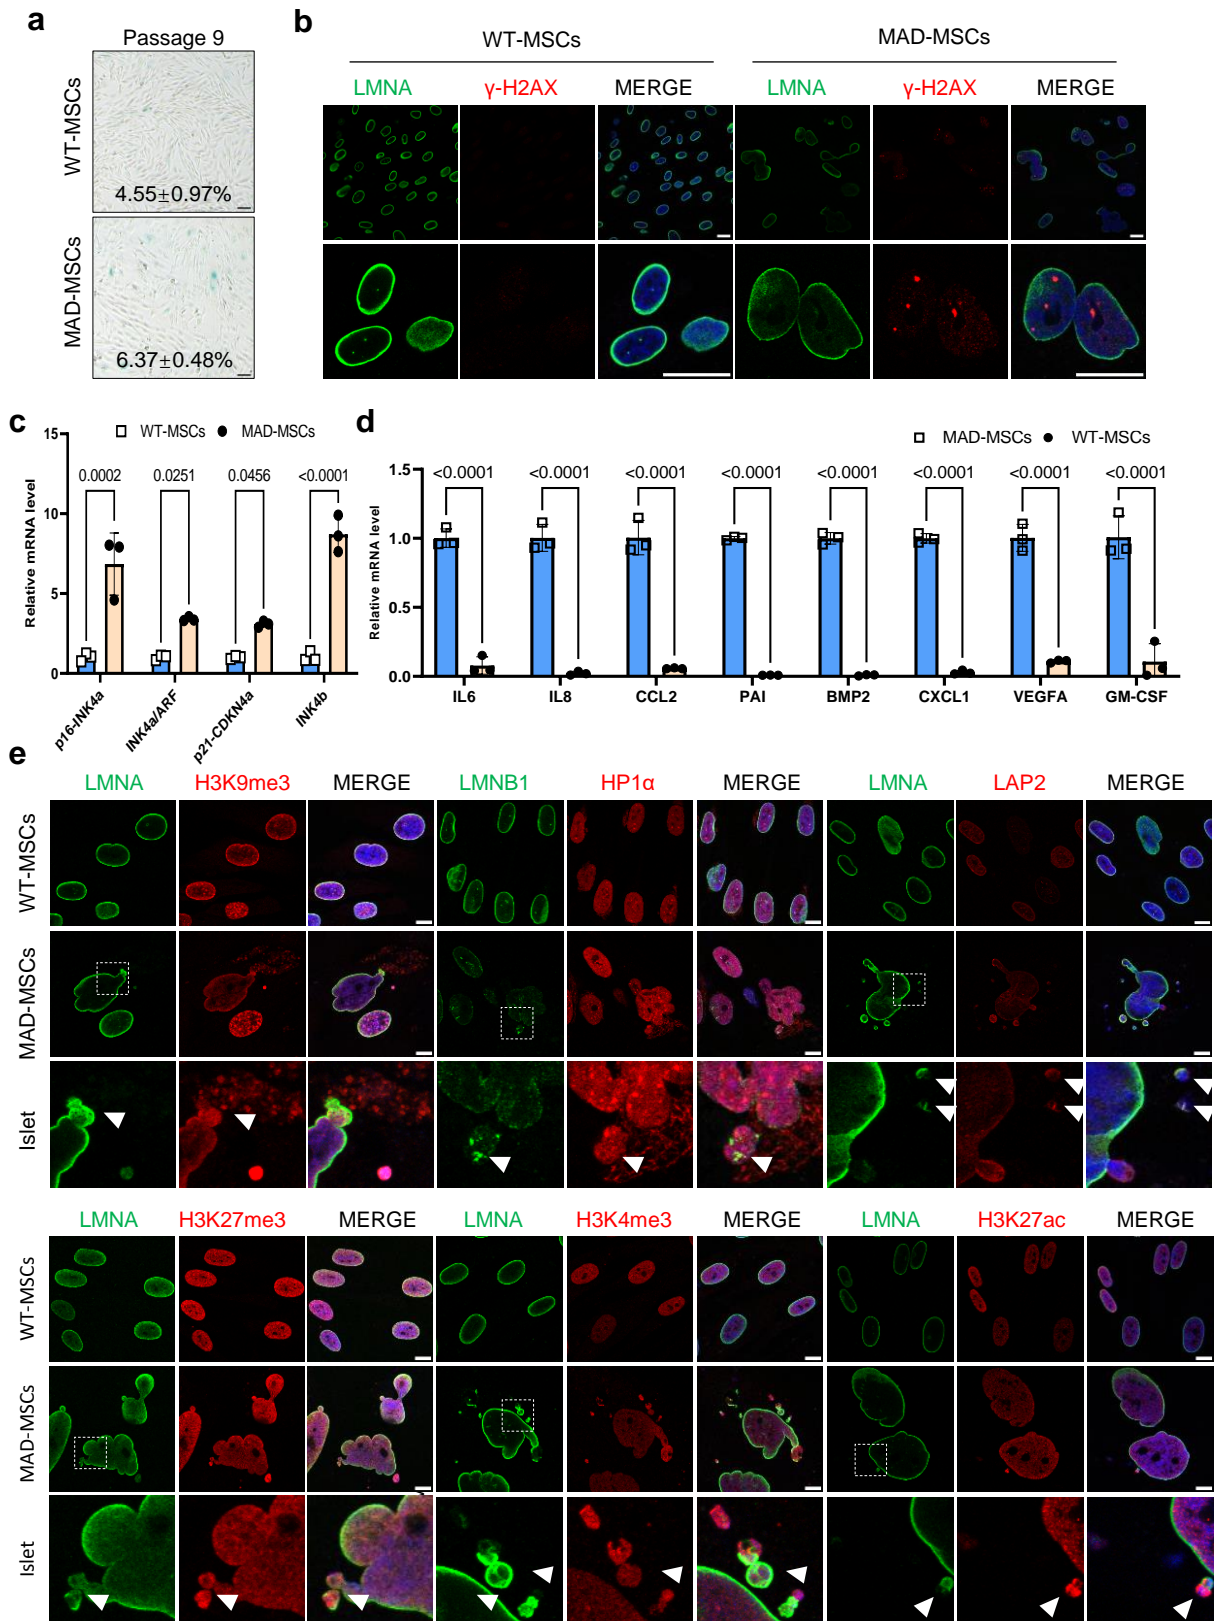

**f**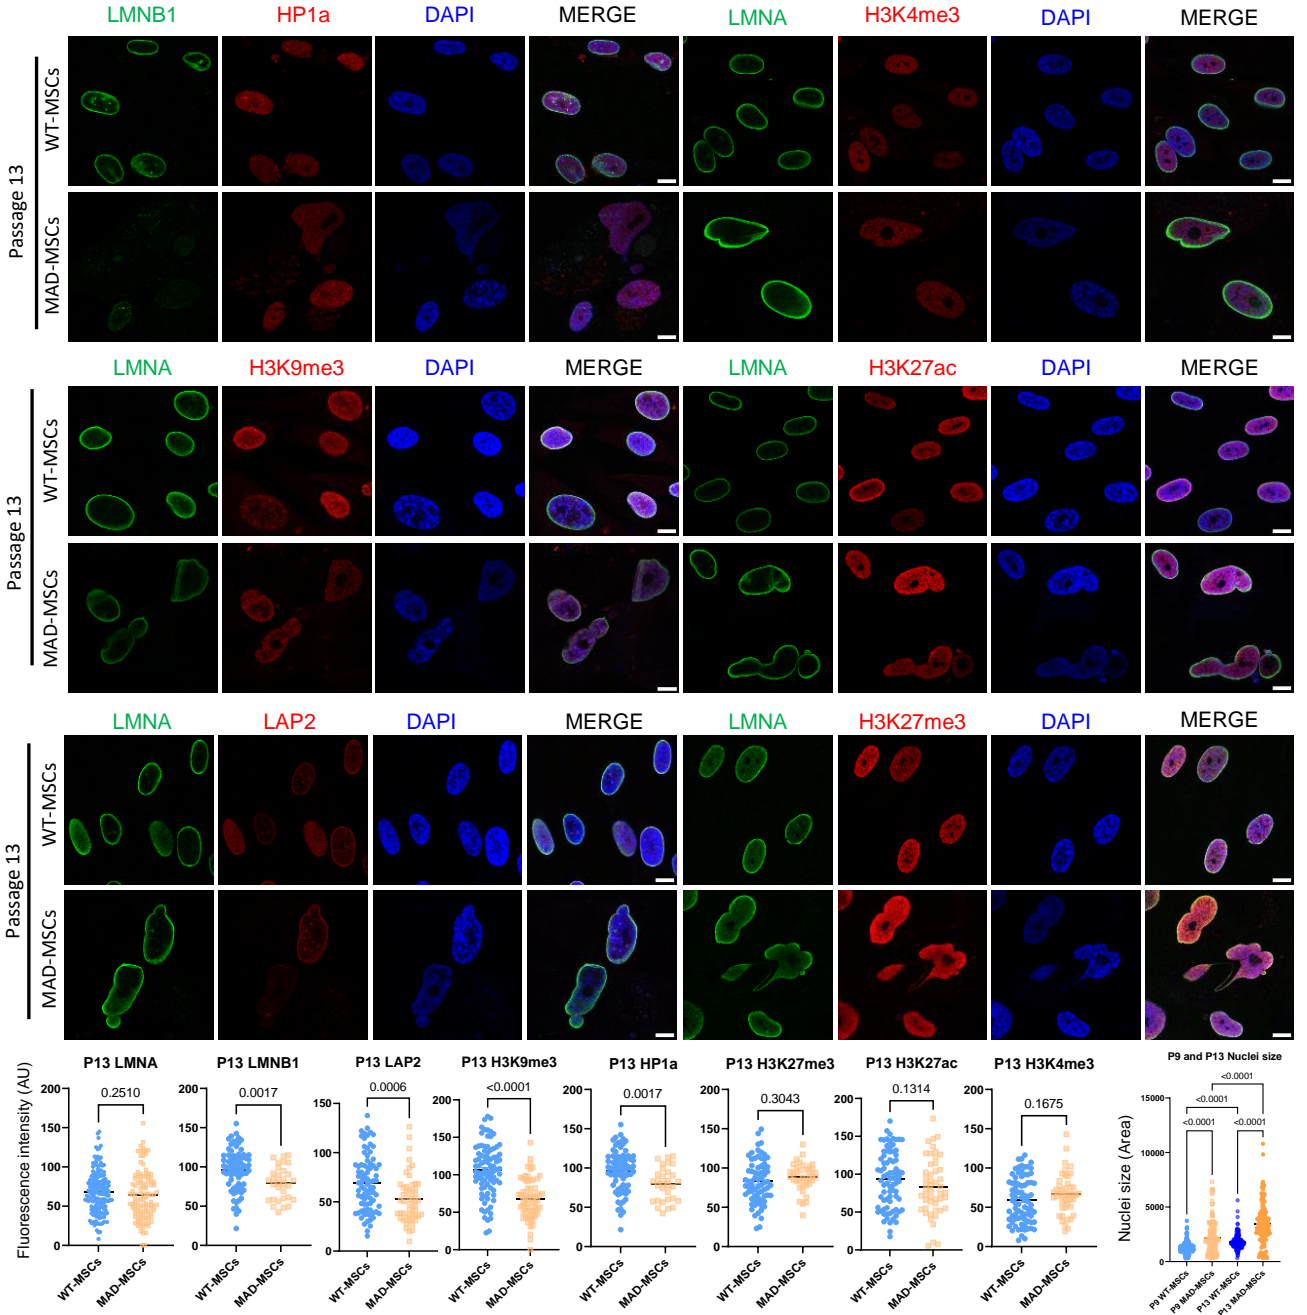

**Supplementary Fig. 6| MAD-MSCs exhibited accelerated exhaustion.** a, SA- $\beta$ -gal staining of early passage (passage 9) of MAD-MSCs, the labeled number indicates positive percentage. Data are mean  $\pm$  SD, the p value was calculated using two-tailed unpaired t-test, n = 3. Three independent biological replicates were performed with similar results. b, Immunostaining of lamin A/C (LMNA, green) and  $\gamma$ -H2A.X (red). DAPI, blue. Scale bar 10  $\mu$ m. c-d, qPCR of the cell cycle arrest genes and inflammasome associated genes. Data were normalized to *18S rDNA* and represent mean  $\pm$  SD; n=3 independent samples, p values were calculated with one-way ANOVA coupled with Tukey's post hoc test. e, Immunostaining of nuclear lamin and histone markers shows nuclear budding, including active and repressive markers. Scale bars, 10  $\mu$ m. f, Immunostaining and quantification of nuclear lamin and histone markers in passage 13 MSCs. Lamin B1 and HP1a (WT n=77, MAD n=31), lamin A/C (WT n=168, MAD n=92), LAP2 (WT n=80, MAD n=28), H3K9me3 (WT n=88, MAD n= 64), H3K27me3 (WT n=181, MAD n= 41), H3K27ac (WT n=80, MAD n= 49), H3K4me3 (WT n=138, MAD n= 52) and nuclei size (WT n=155, MAD n= 137). Data are mean  $\pm$  SD; the lines in scatter dot plot indicate the averaged intensity and the p values were calculated using two-tailed unpaired t-test. The images were repeated from three independent biological experiments with similar results. Source data are provided as a Source Data file.

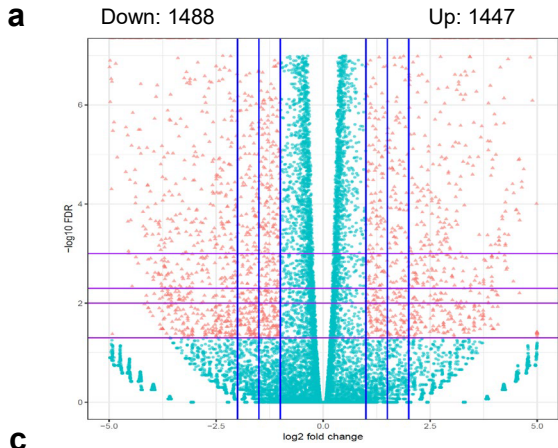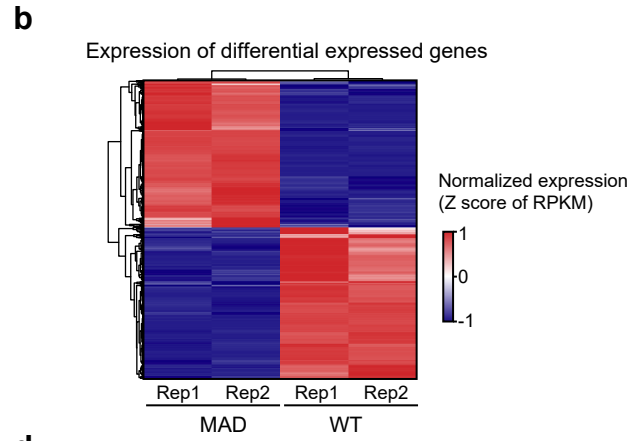

**c**

| GAD DISEASE                         | # GENE | p value  |
|-------------------------------------|--------|----------|
| Blood Pressure                      | 97     | 6.90E-11 |
| Heart Failure                       | 80     | 6.40E-09 |
| Myocardial Infarction               | 100    | 2.50E-08 |
| Autism                              | 74     | 2.80E-08 |
| Echocardiography                    | 77     | 7.80E-08 |
| Heart Rate                          | 57     | 3.80E-07 |
| Glucose                             | 51     | 2.80E-06 |
| Cardiomyopathy                      | 16     | 1.50E-05 |
| Stroke                              | 90     | 2.10E-05 |
| Body Weight                         | 70     | 8.10E-05 |
| Body Height                         | 91     | 8.80E-05 |
| Bone Mineral Density                | 69     | 1.50E-04 |
| Bone Density                        | 42     | 3.50E-04 |
| Hypertension                        | 103    | 7.80E-04 |
| Obesity                             | 60     | 9.80E-04 |
| Dilated cardiomyopathy              | 12     | 2.40E-03 |
| Arteries                            | 30     | 2.70E-03 |
| Hyperparathyroidism, Secondary      | 28     | 3.10E-03 |
| Dementia, Vascular                  | 6      | 3.70E-03 |
| kidney aging                        | 20     | 8.00E-03 |
| Fibrinogen                          | 27     | 8.00E-03 |
| Myocardial infarct                  | 23     | 8.70E-03 |
| Osteoarthritis                      | 15     | 8.90E-03 |
| Atherosclerosis                     | 53     | 1.10E-02 |
| Blood Coagulation Factor Inhibitors | 4      | 3.10E-02 |
| Heart disease, ischemic             | 10     | 3.50E-02 |

**d**

| GAD DISEASE                           | # GENE | p value  |
|---------------------------------------|--------|----------|
| Bone Mineral Density                  | 61     | 3.10E-06 |
| Pharmacogenetic studies               | 23     | 3.00E-05 |
| Atherosclerosis                       | 48     | 3.80E-04 |
| Hypertension                          | 81     | 7.60E-04 |
| Endometriosis                         | 19     | 8.50E-04 |
| Weight loss                           | 8      | 8.60E-04 |
| Type 2 Diabetes                       | 213    | 1.00E-03 |
| Nasopharyngeal Neoplasms              | 11     | 1.10E-03 |
| Lymphoma, Non-Hodgkin                 | 35     | 1.40E-03 |
| Brain Ischemia Stroke                 | 18     | 1.40E-03 |
| Premature ovarian failure             | 35     | 1.50E-03 |
| 1-hydroxypyrene, urinary              | 6      | 1.60E-03 |
| Birth Weight Body Weight              | 4      | 1.90E-03 |
| left ventricular hypertrophy          | 9      | 1.90E-03 |
| Diabetes, type 1                      | 28     | 2.30E-03 |
| Myocardial Infarction                 | 62     | 2.90E-03 |
| Pulmonary Disease                     | 16     | 3.40E-03 |
| Multiple myeloma                      | 22     | 4.20E-03 |
| Chronic renal failure Kidney Failure  | 95     | 4.40E-03 |
| Hypertension; blood pressure          | 4      | 4.50E-03 |
| Pregnancy loss, recurrent             | 12     | 4.80E-03 |
| Aging                                 | 9      | 5.40E-03 |
| Chronic obstructive pulmonary disease | 49     | 5.40E-03 |
| Vascular Diseases                     | 5      | 5.70E-03 |
| Atherosclerosis, coronary             | 23     | 5.70E-03 |
| Macular Degeneration                  | 7      | 6.20E-03 |

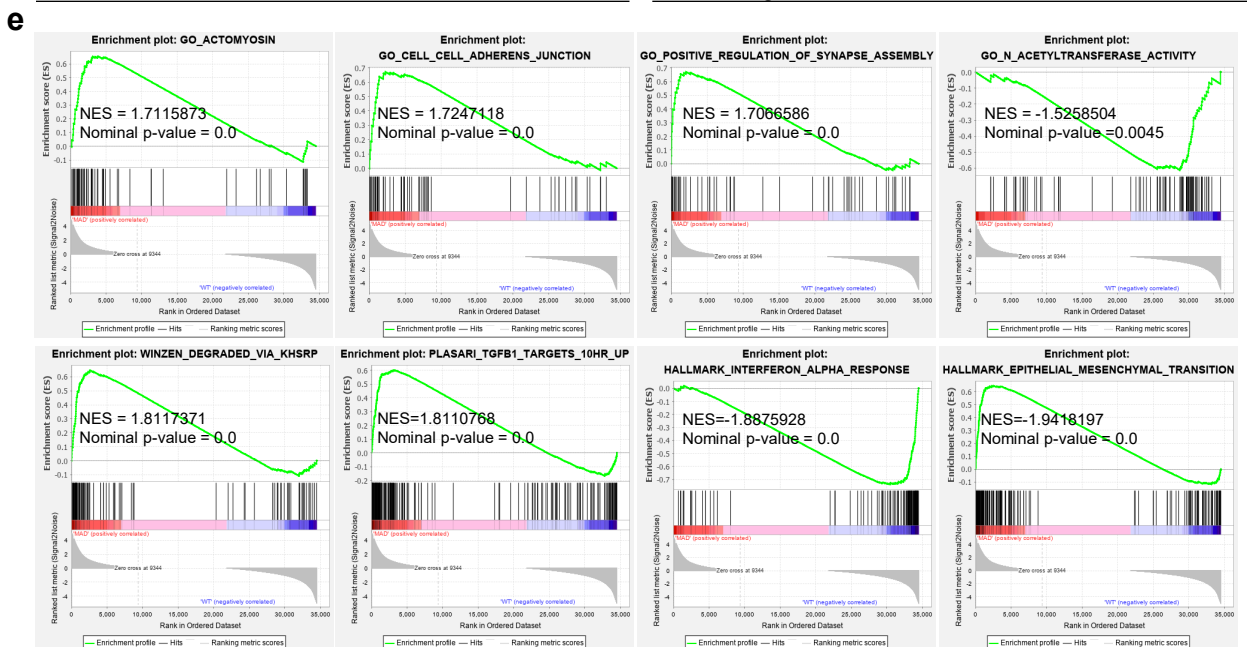

**Supplementary Fig. 7 | Transcriptome analysis of MAD-MSCs.** a-b, Volcano plot and heatmap of differentially expressed genes in WT-MSCs and MAD-MSCs based on RNA sequencing (two replicated of each sample, FDR<0.05). The number of upregulated and downregulated genes are indicated. c-d, Diseases enrichment of differentially expressed genes in MAD-MSCs according to GAD database, upregulated enrichment (c) and downregulated enrichment (d). Enriched gene number and p value were indicated. e, Representative GSEA enriched pathways, enrichment score and p value were indicated. All p-values were determined using the two-sided Wilcoxon rank-sum test.



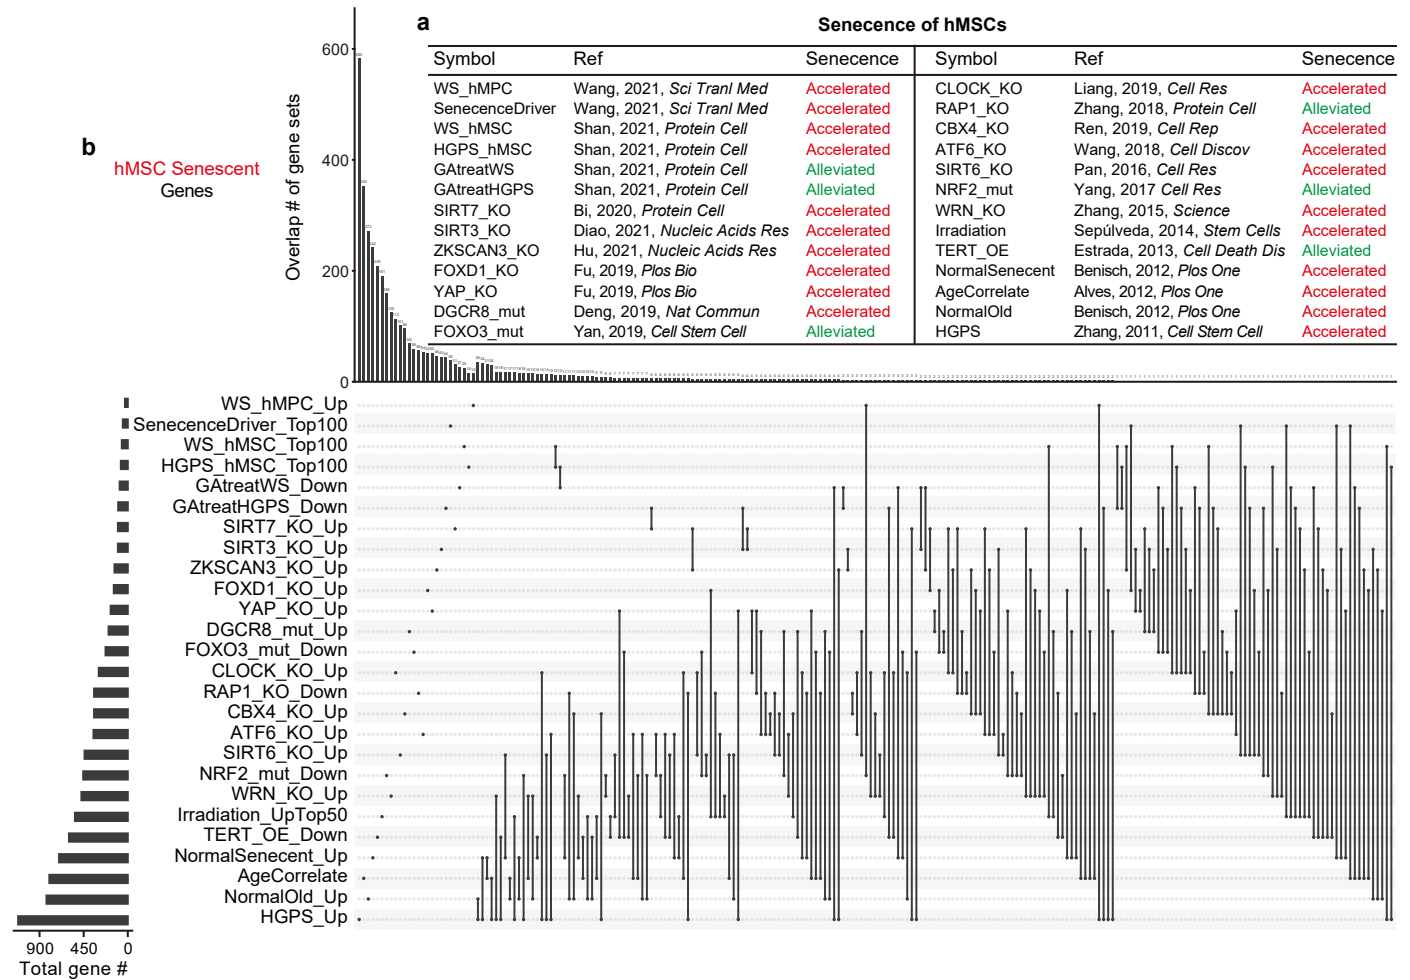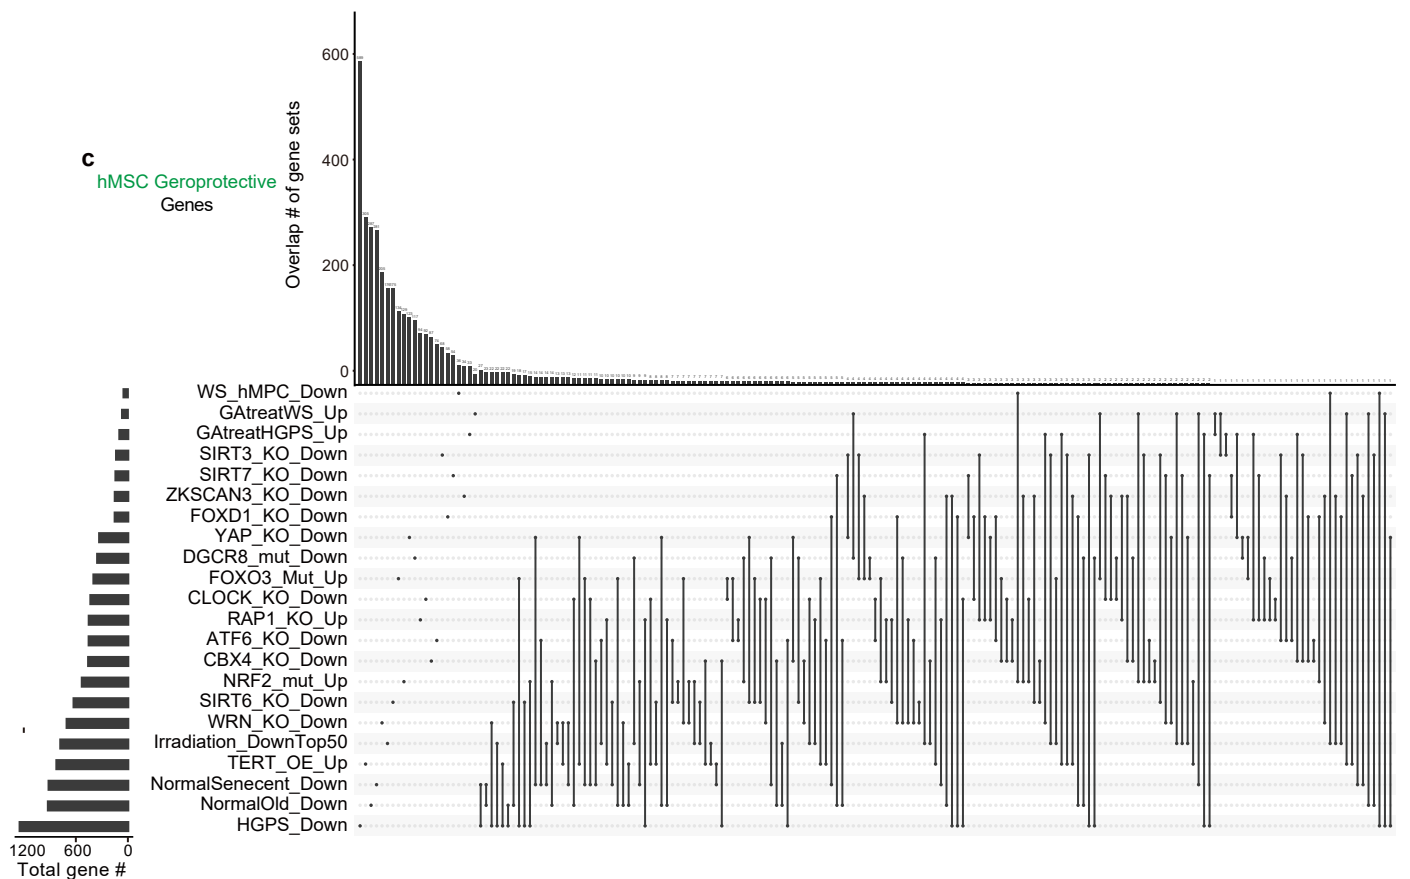

d

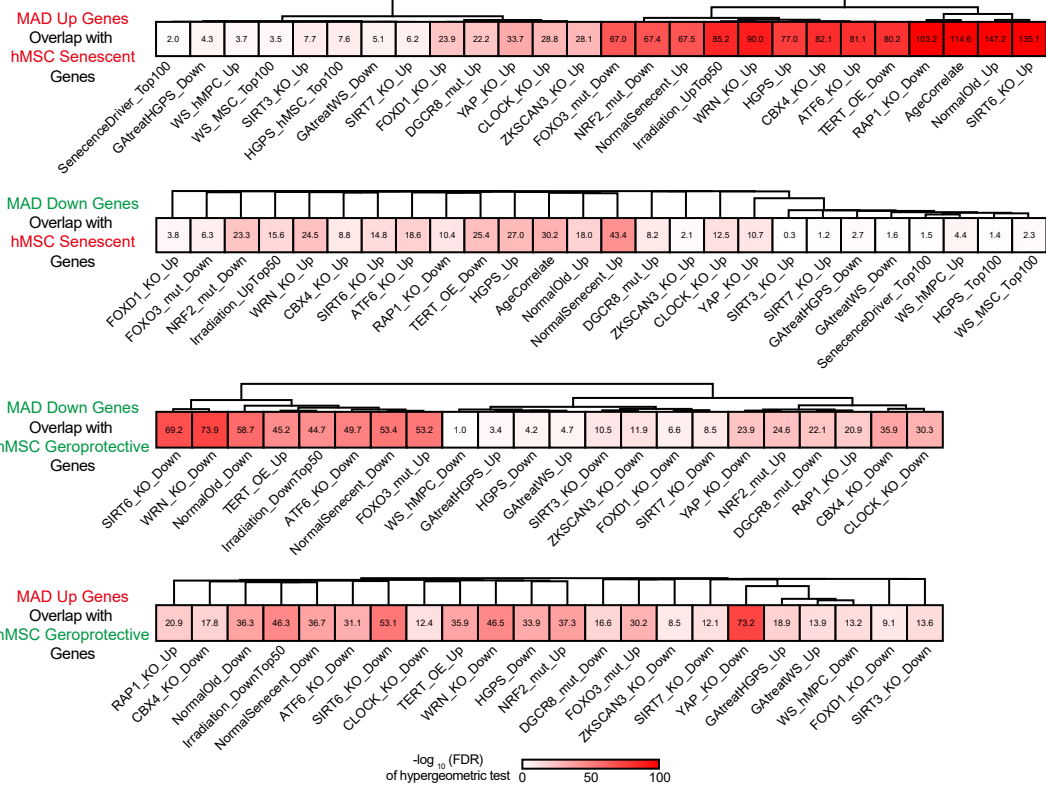

**Supplementary Fig. 8| Cross-analysis of hMSCs aging transcriptomes with MAD-MSCs.**

a, Summary of used human MSCs aging models, including 20 accelerated and 6 alleviated aging hMSCs transcriptomes. Relevant reference paper and senescence state are indicated. b, Cross-analysis of senescence-associated genes in the transcriptomes from different hMSCs aging models. c, Cross-analysis of geroprotection-associated genes in the transcriptomes from different hMSCs aging models. d, Cross-analysis of senescence/geroprotection associated profile enrichment in the transcriptomes from different hMSCs aging models.

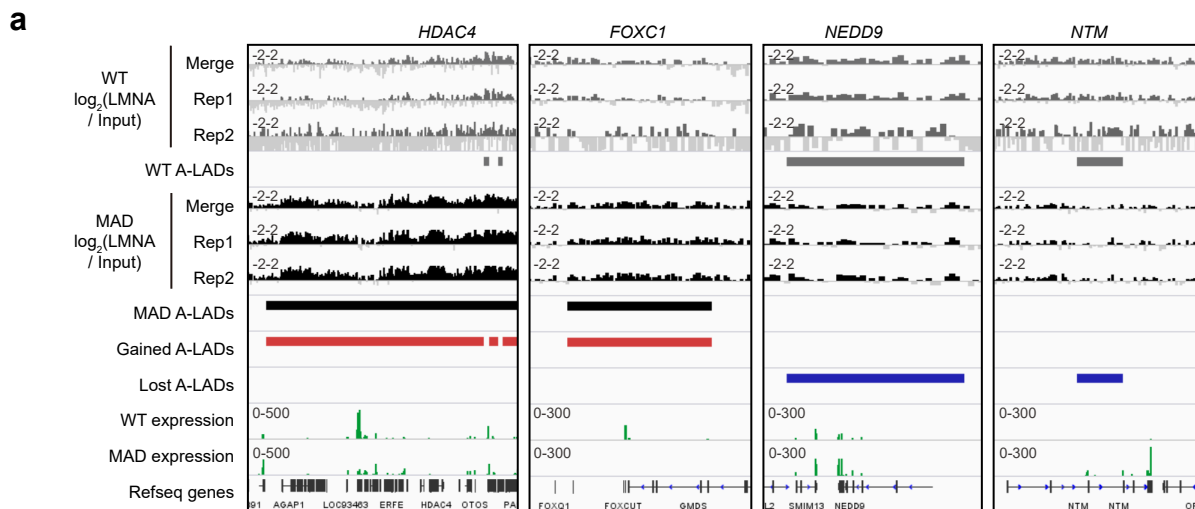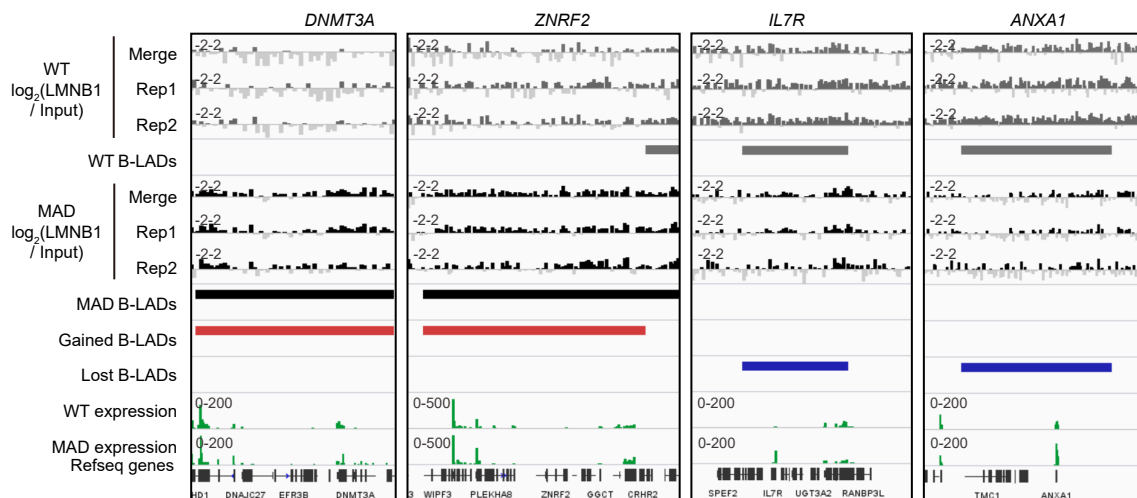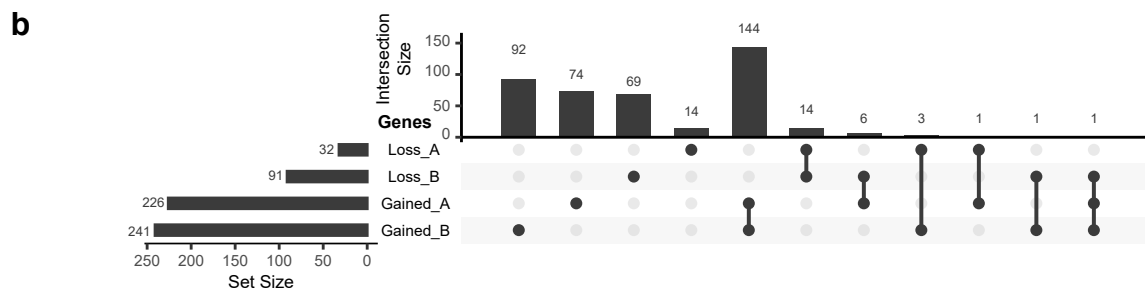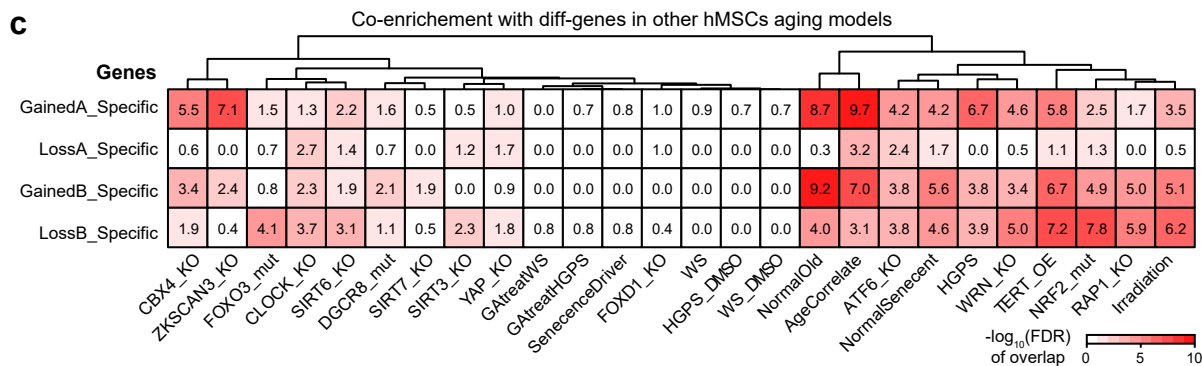

**d**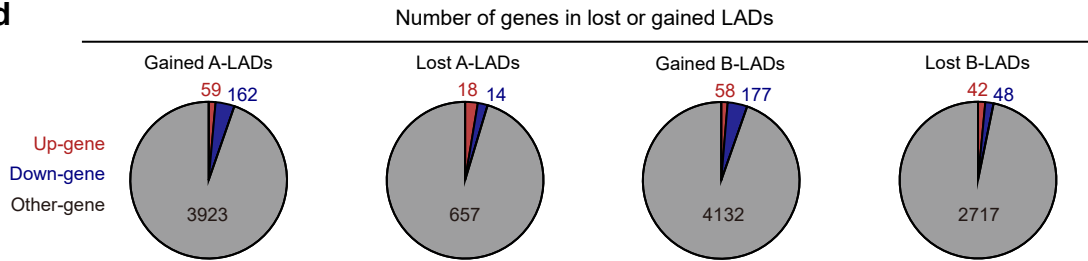**e**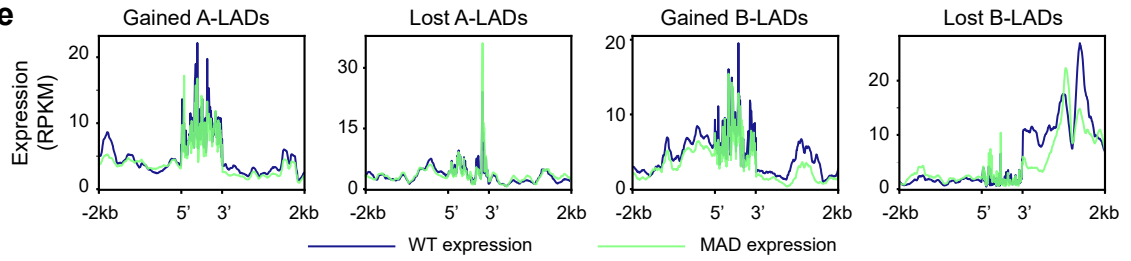

**Supplementary Fig. 9| Reorganization of A and B lamina-associated domain in MAD-  
MSCs.** a, Representative LADs reorganization and changes in gene expression. b,  
Intersection of changed gene sets linked to lost and gained A/B-LADs categories. c, The  
enrichment between the unique dysregulated genes specific to A- or B-LADs reorganization  
in MAD-MSCs and geroprotection/senescence-associated profiles in different hMSCs  
aging models. Color depth indicated enrichment score. d, Pie charts showing the summary  
of the number of genes in the gained and lost LADs. e, Average plots showing average  
gene expression in the indicated domains. The y-axis values represented RPKM.

**a**

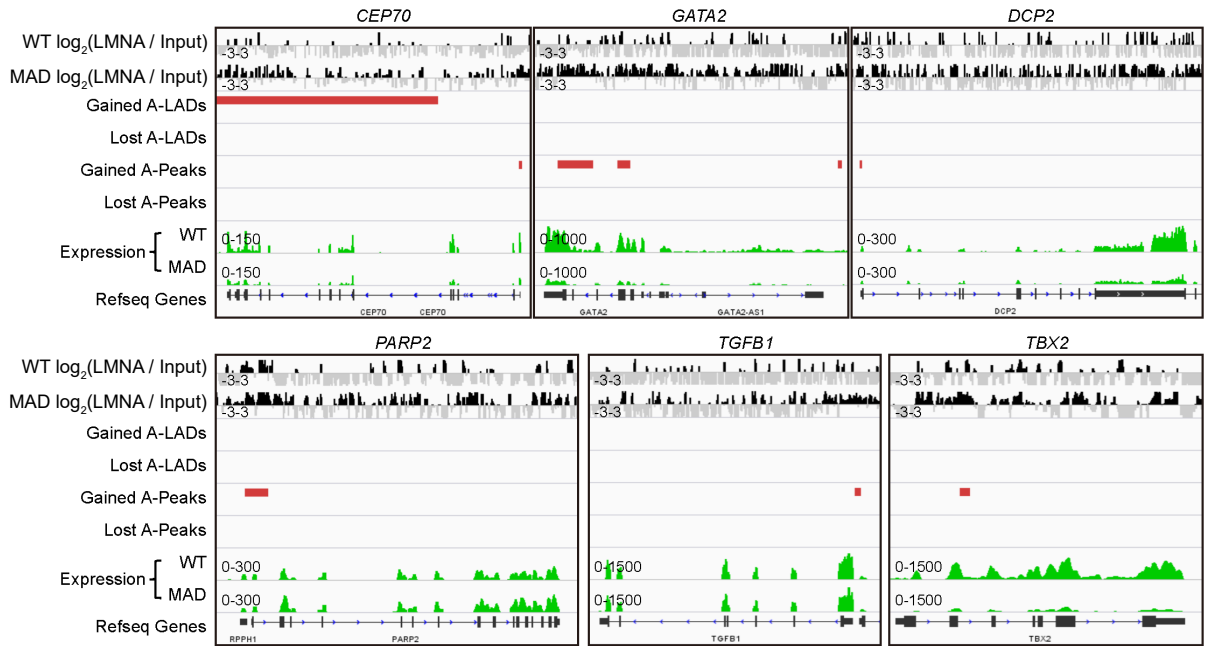

**b**

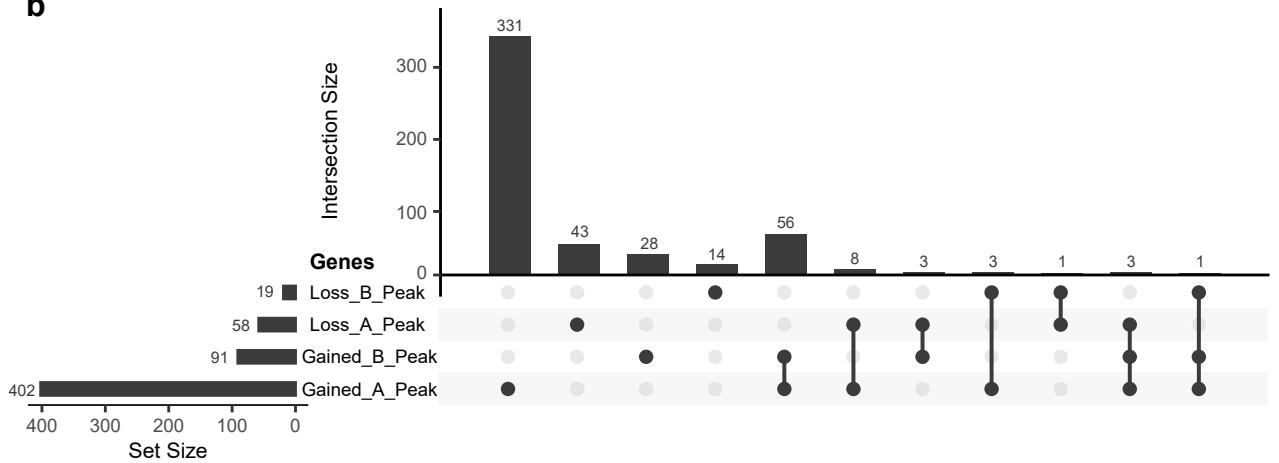

**c**

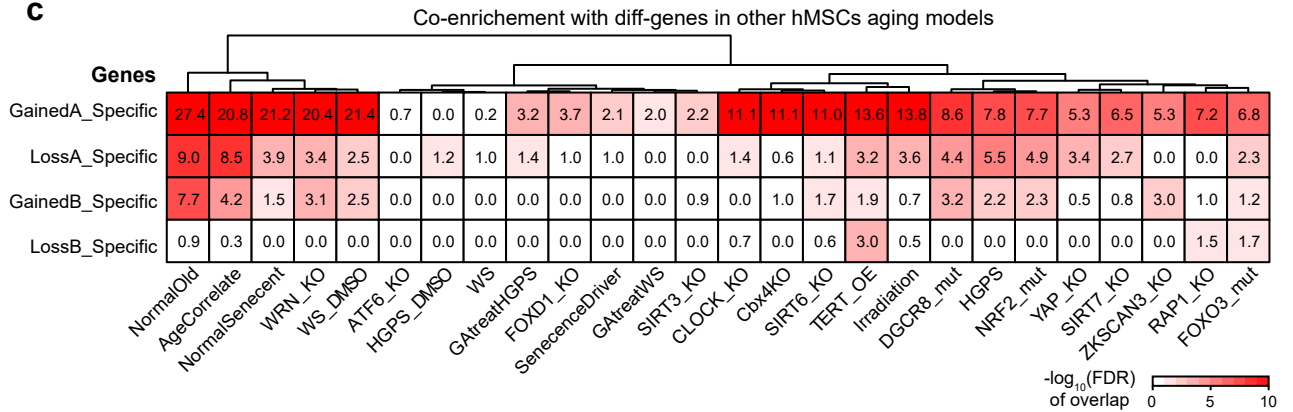

**Supplementary Fig. 10| Reposition of A and B non-LAD lamina-chromatin binding peaks in MAD-MSCs.** a, Representative reposition of non-LAD lamina-chromatin binding peaks and changes in gene expression. b, Intersection of changed gene sets correlated with repositioned non-LAD lamina-chromatin binding. c, The enrichment between the unique dysregulated genes specific to repositioned non-LADs lamina-chromatin binding in MAD-MSCs and geroprotection/senescence-associated profile in different hMSCs aging models. Color depth indicates the enrichment score.



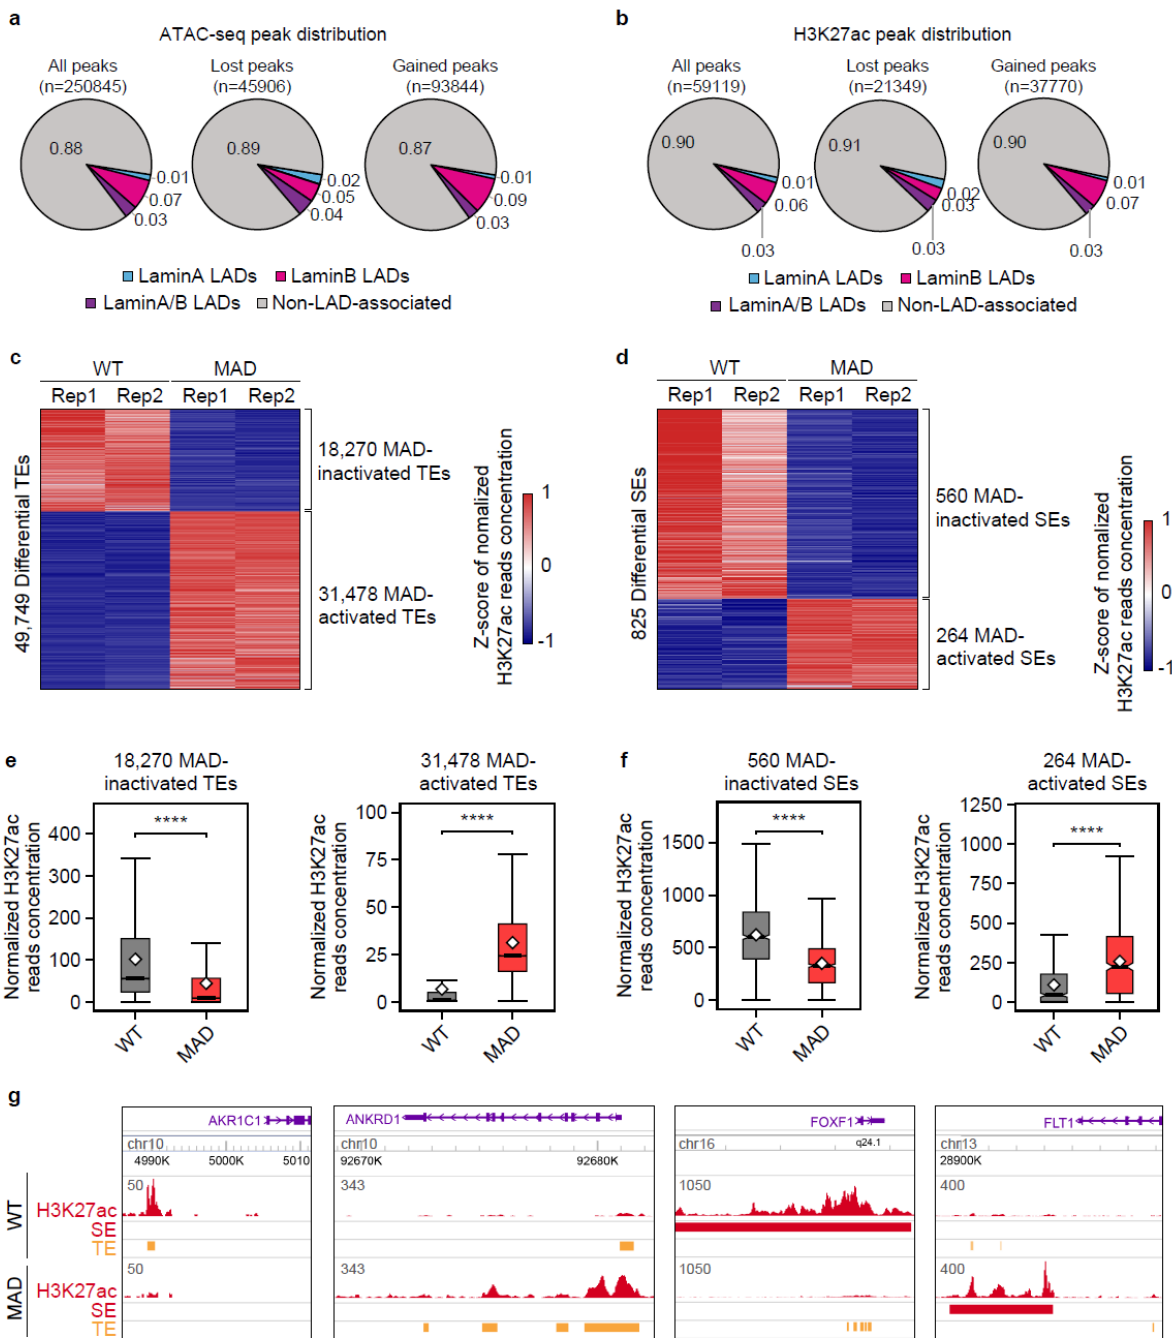

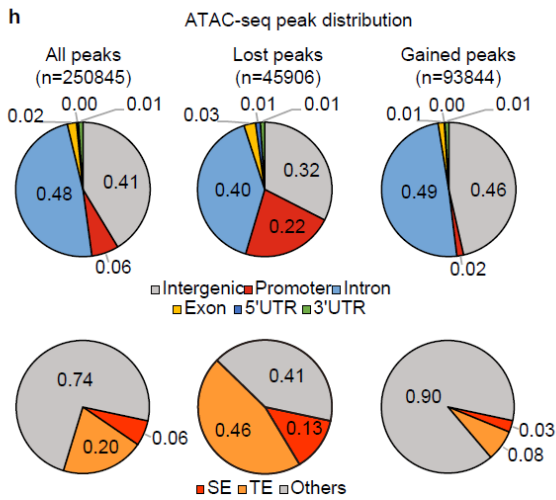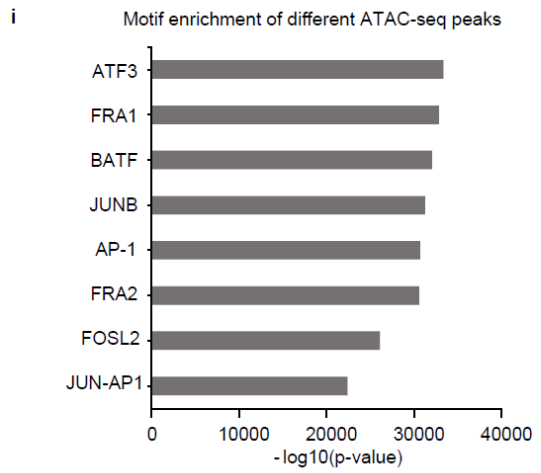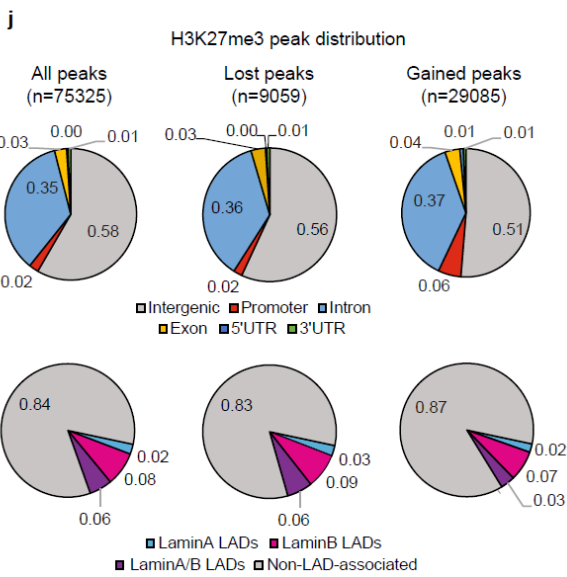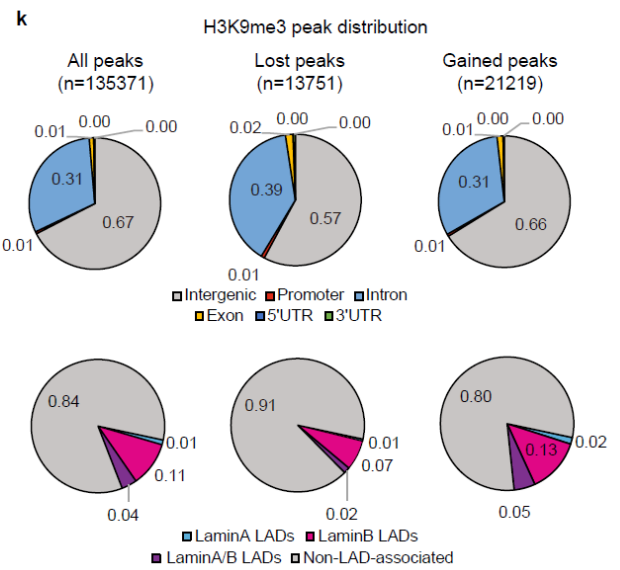

**Supplementary Fig. 11| Distribution of chromatin modifications and lamina-chromatin interaction in MAD-MSCs.** a, The distribution of ATAC peaks within and beyond A-/B-LADs. b, The distribution of H3K27ac peaks within and beyond A-/B-LADs. c-d, Heatmaps of differential typical enhancers (TEs) and super enhancers (SEs). e-f, Annotation of active and inactive TEs/SEs in MAD-MSCs. g, Representative genes with active and inactive TEs and SEs in MAD-MSCs. h, Global ATAC peaks distribution and their correlation with TEs and SEs. i, HOMER transcription factor motif enrichment analysis of ATAC peaks. j-k, Global distribution of H3K27me3 and H3K9me3 peaks and their relationship with A-/B-LADs. All p-values were determined using the two-sided Wilcoxon rank-sum test.

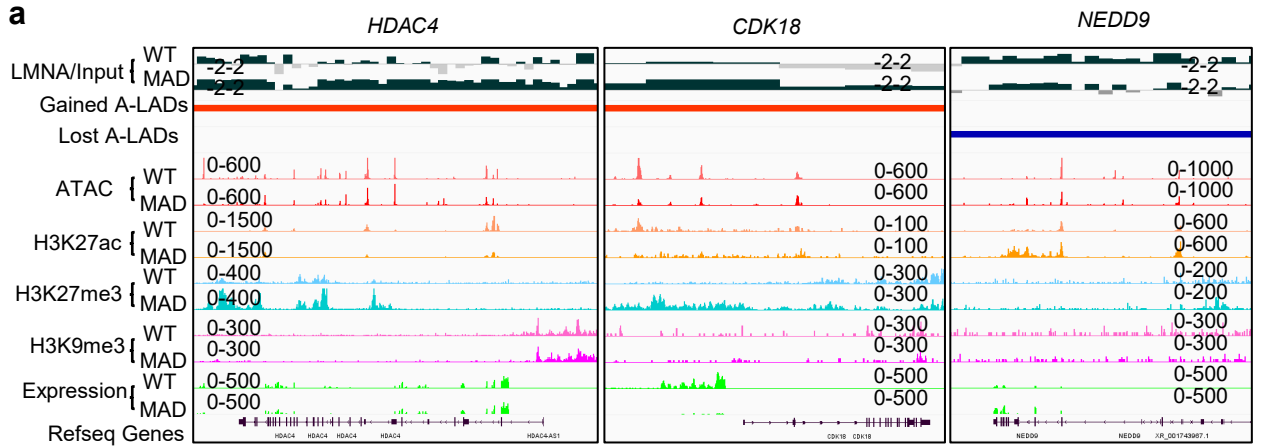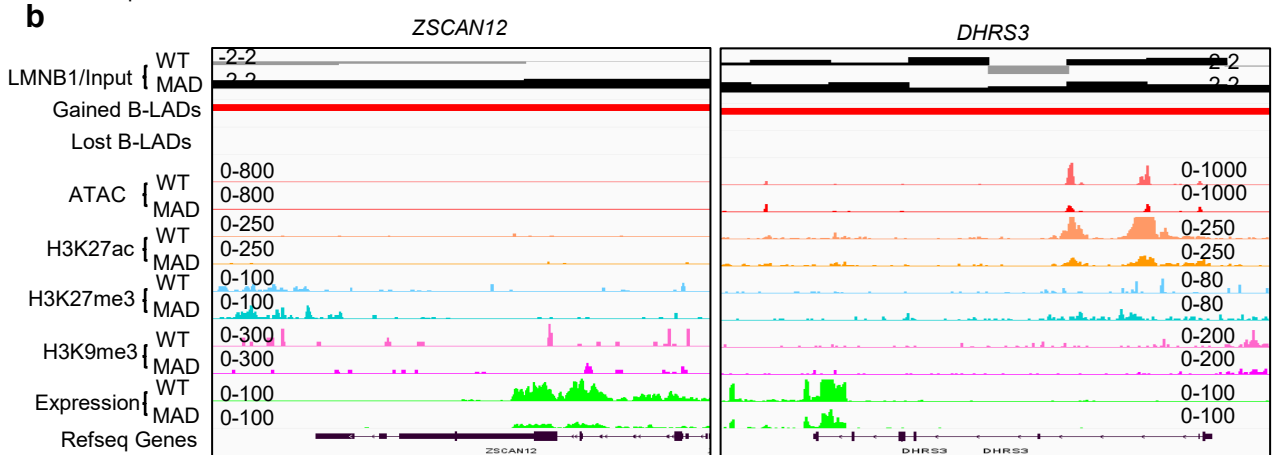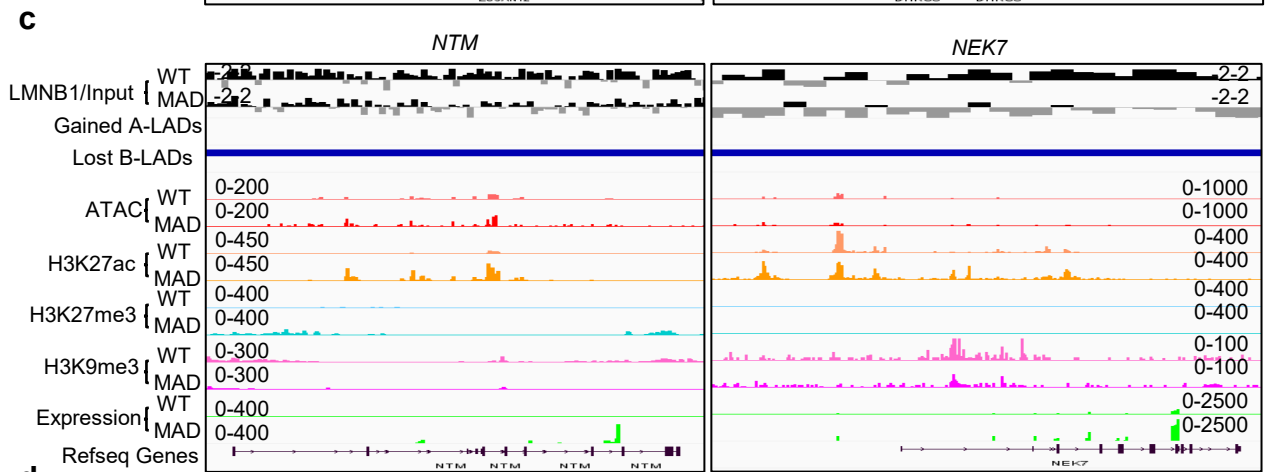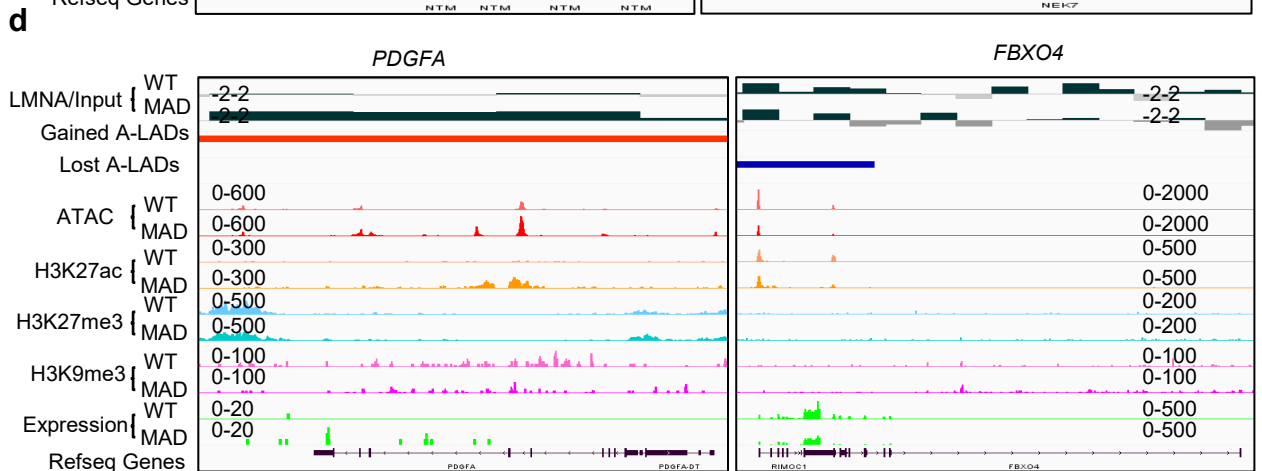

**Supplementary Fig. 12| Integrated analysis of chromatin features and LADs reorganization.** a-b, Representative gene regulation by coordinated control of chromatin features and A-LADs reorganization. c-d, Representative gene regulation by coordinated control of chromatin features and B-LADs reorganization.

**a**

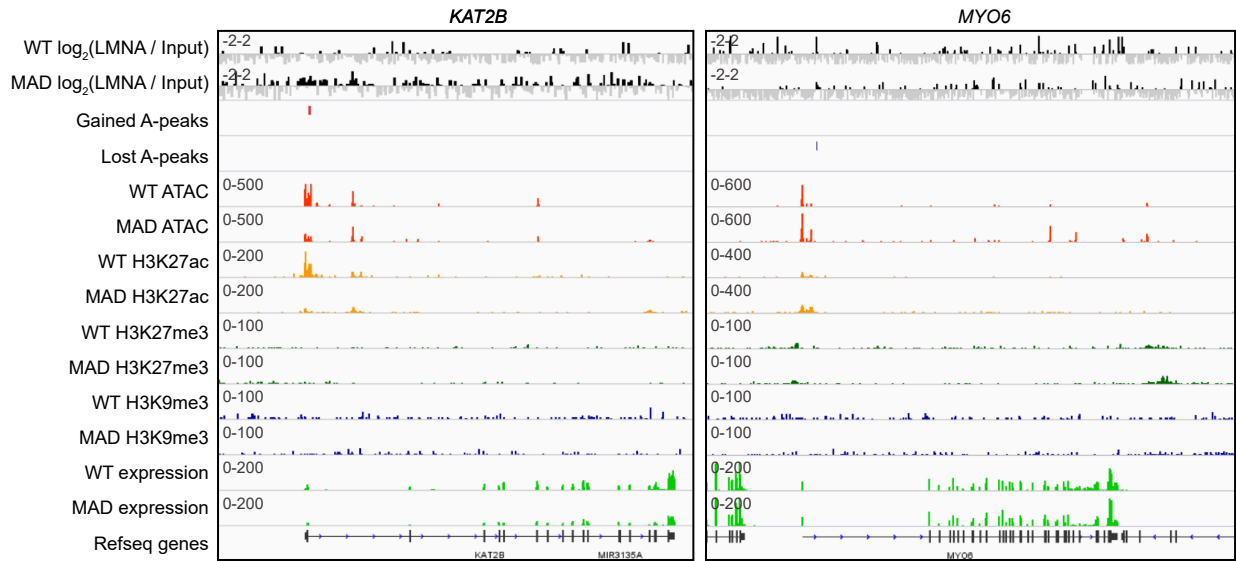

**b**

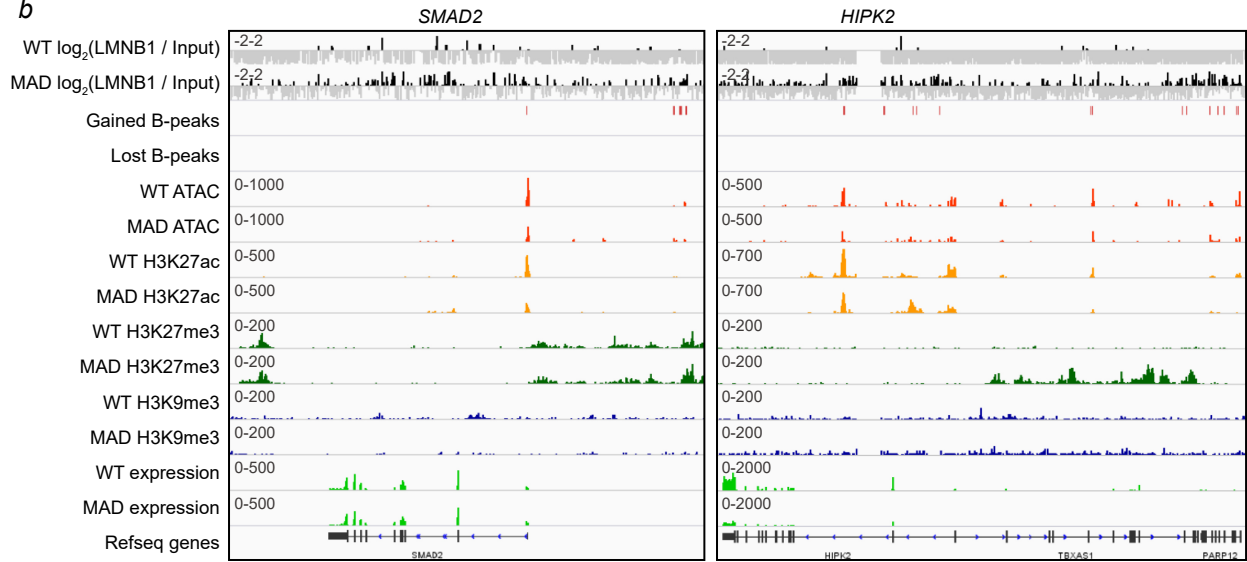

**Supplementary Fig. 13| Integrated analysis of chromatin features and repositioned non-LAD lamina-chromatin binding peaks.** a, Representative gene regulation by coordinated control of chromatin features and reposition of A-type non-LAD lamina-chromatin binding peaks. b, Representative gene regulation by coordinated control of chromatin features and reposition of B-type non-LAD lamina-chromatin binding peaks.

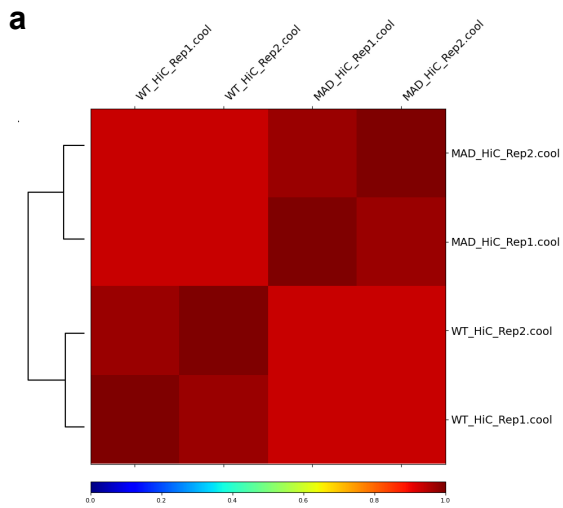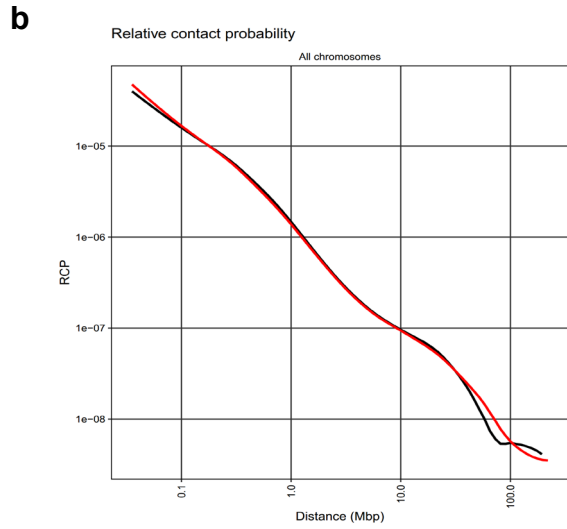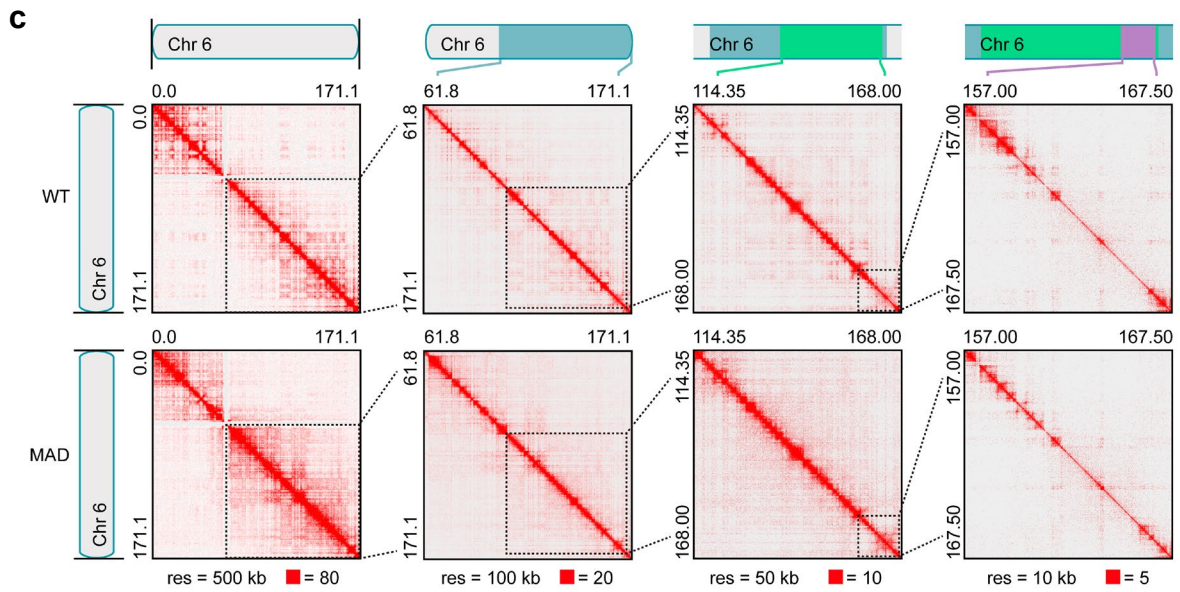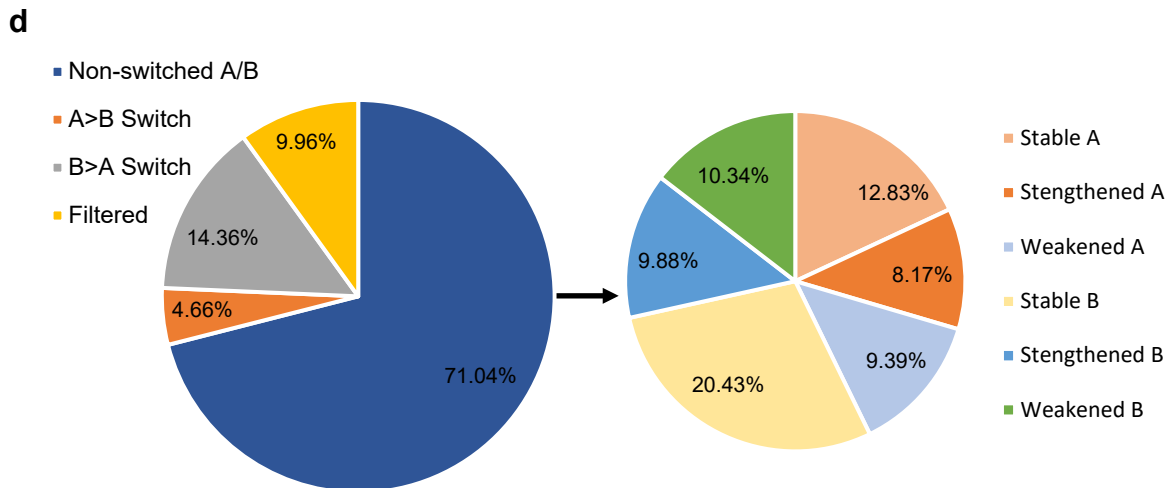



**Supplementary Fig. 14| Hierarchical chromatin structure change in MAD-MSCs.** a, Normalized heatmap of HiC data obtained from WT-MSCs and MAD-MSCs with two replicates. b, Analysis of relative contact probability (RCP) at different distance cross chromosome. c, Zoomed-in views of the representative interaction heatmaps at specific genomic region in WT-MSCs and MAD-MSCs (500-kb, 100-kb, 50-kb and 10-kb bin). d, Percentage of compartment A/B switch in MAD-MSCs, compared to WT-MSCs.

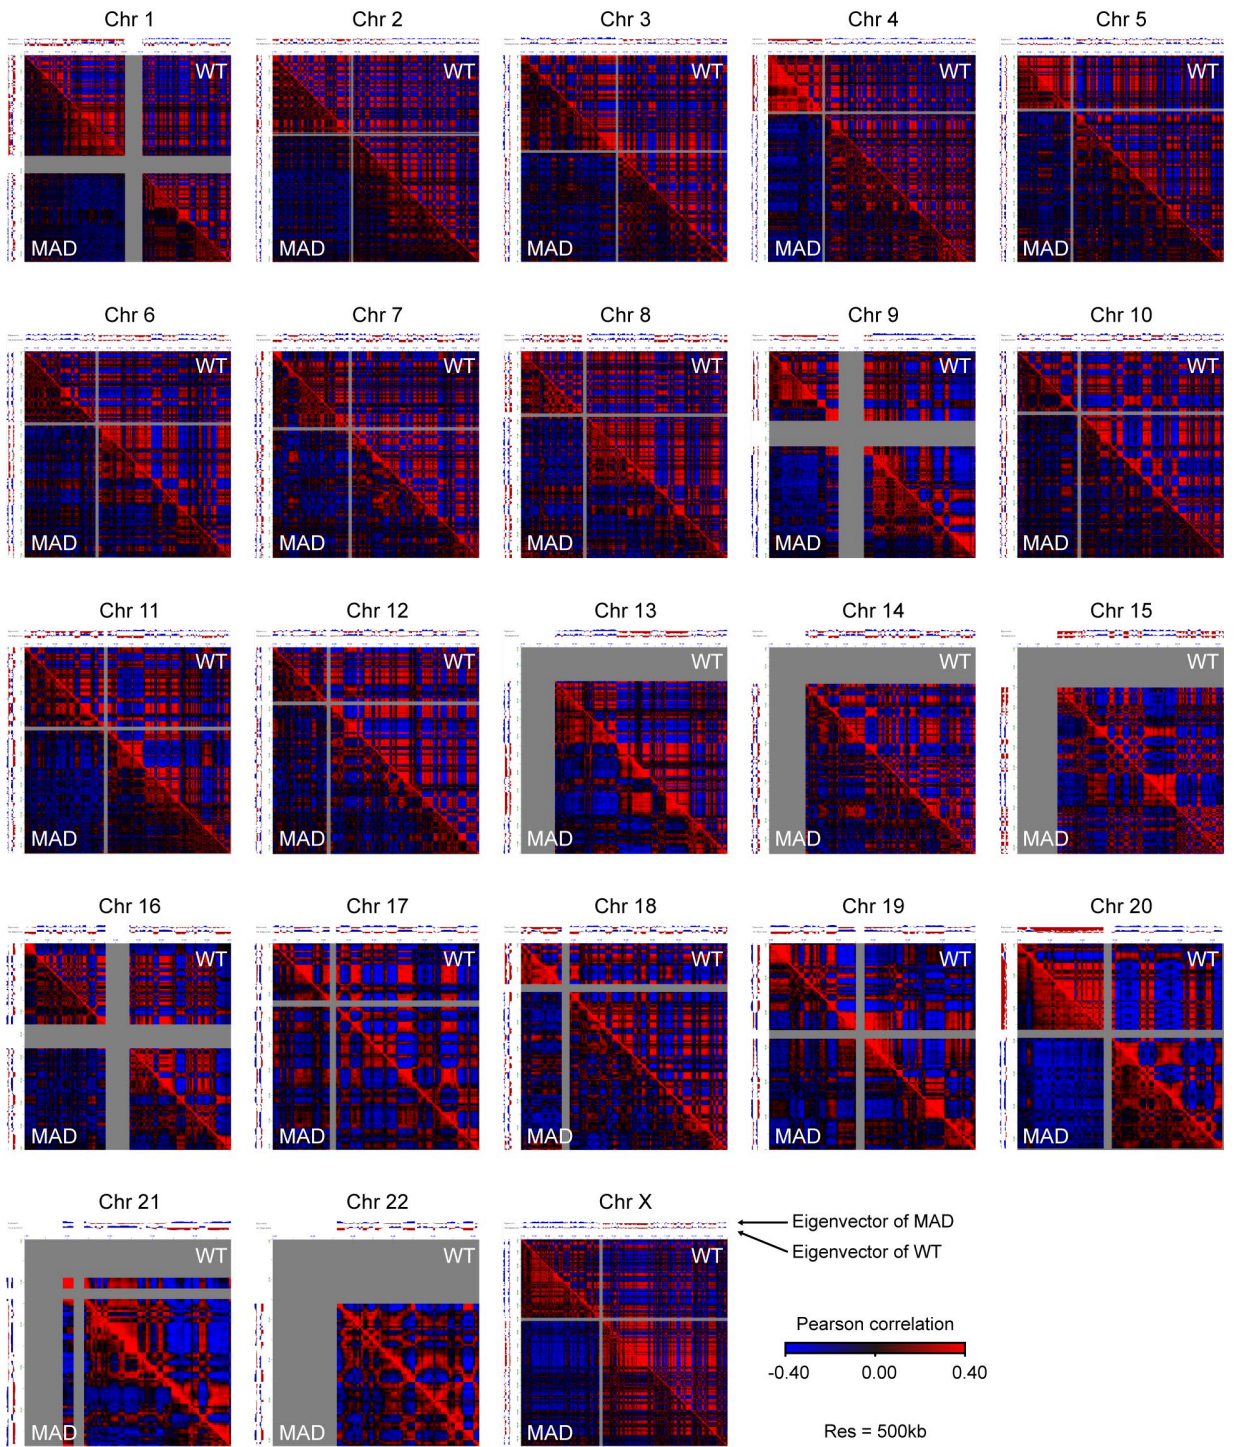

**Supplementary Fig. 15| Global decreased chromatin compartmentalization in MAD-  
MSCs.** Compartmentalization analysis of each chromosome in WT-MSCs and MAD-MSCs.

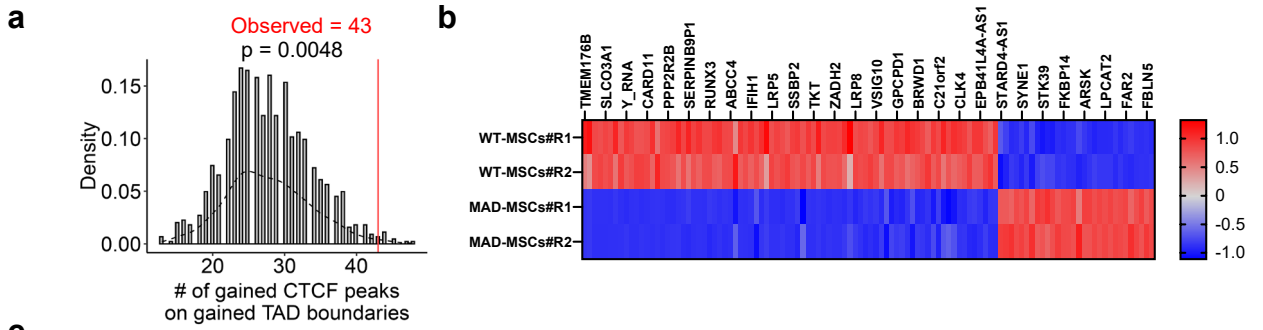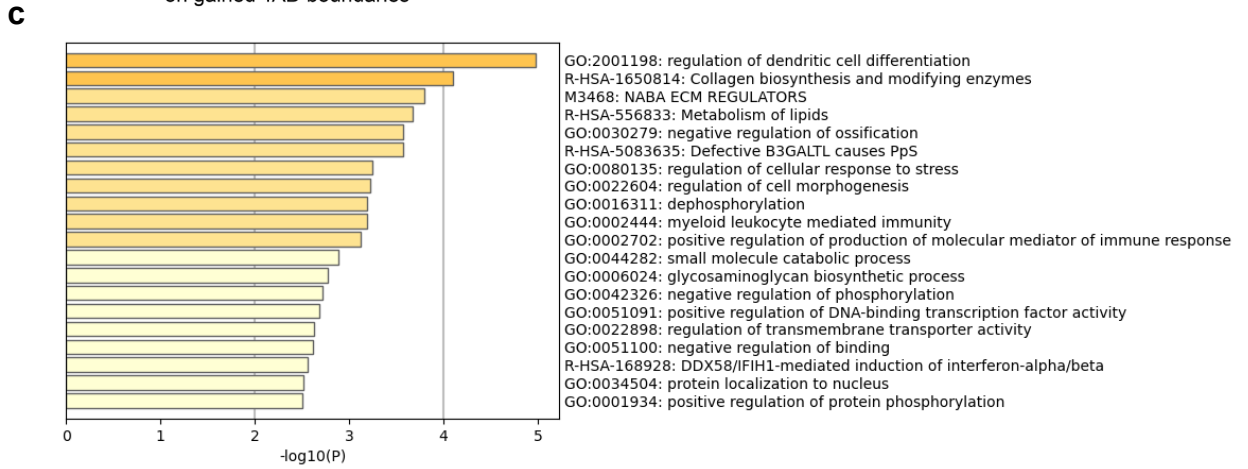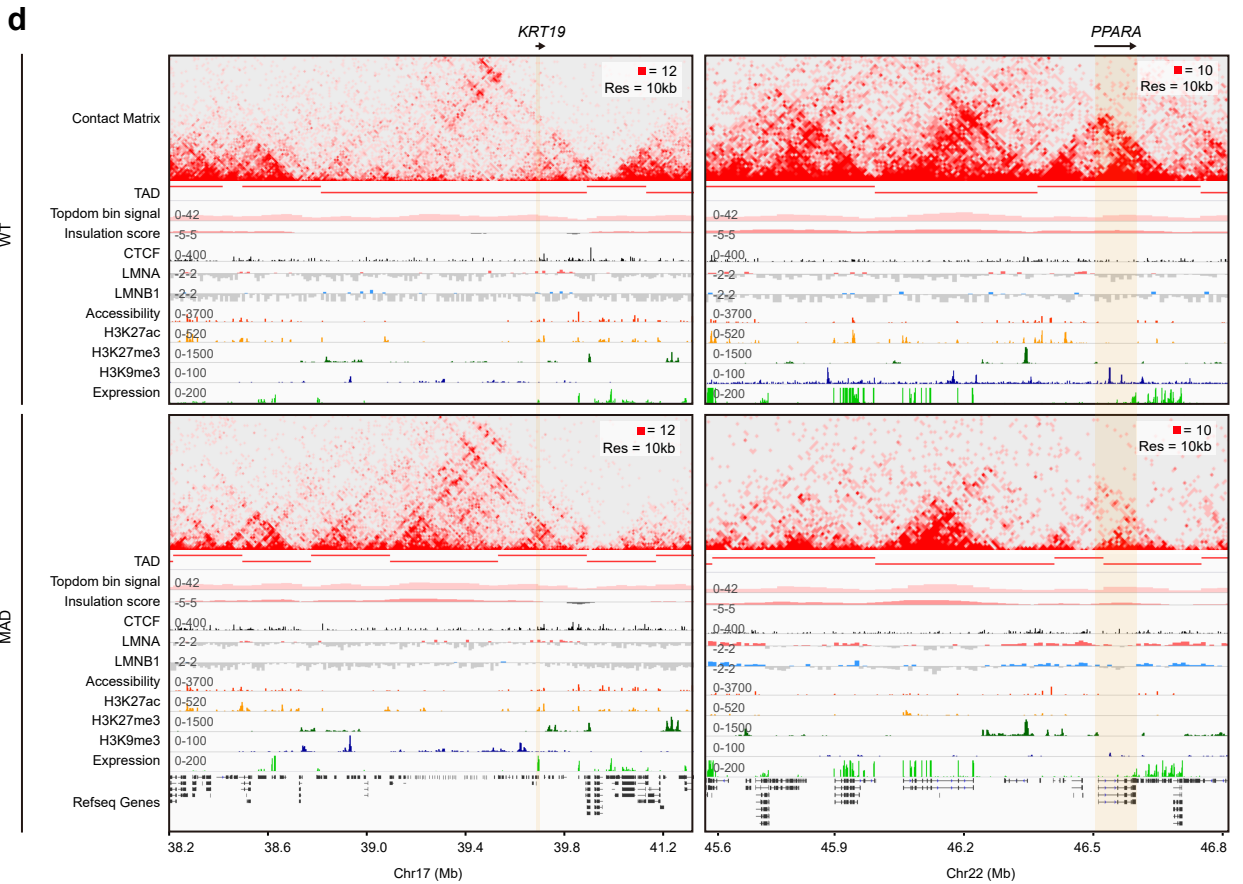

**Supplementary Fig. 16| Gene dysregulation in shortened TADs and altered lamina-chromatin interaction regions.** a, Permutated and observed CTCF bindings at the TAD boundaries in MAD-MSCs. b, Heatmap of dysregulated genes expression in shortened TADs and altered lamina-chromatin interaction regions. c, Enriched pathway of dysregulated transcription in shortened TADs and altered lamina-chromatin interaction regions. d, Representative dysregulated genes expression in shortened TADs. e, Representative genomic browser views of reorganized TADs in WT and MAD, including *KRT19* and *PPARA*. The y-axis values of lamina (LMNA or LMNB1) represented log<sub>2</sub>RPKM (Signal vs Input). The y-axis values of accessibility, histone modifications and expression represented RPKM. All p-values were determined using the two-sided Wilcoxon rank-sum test.

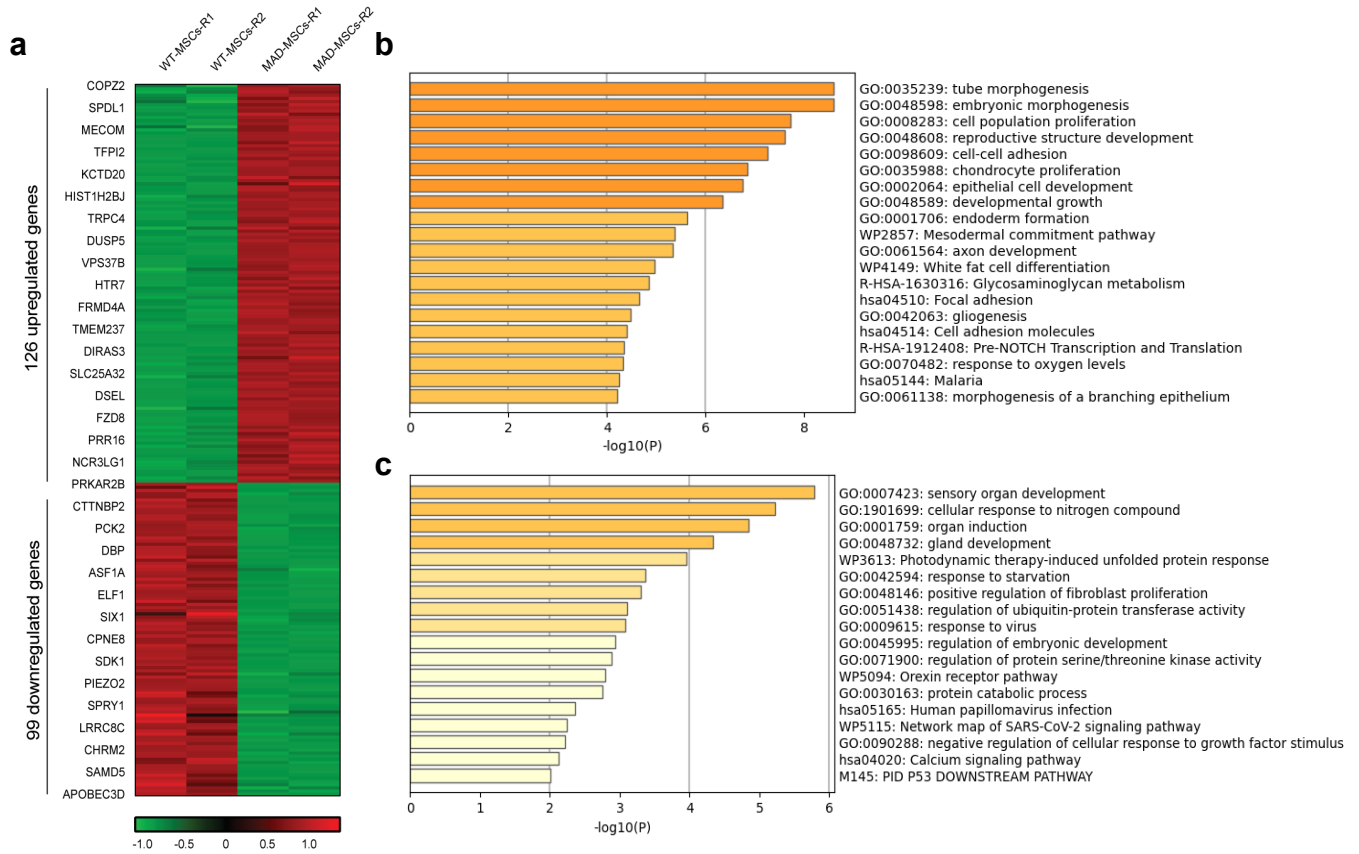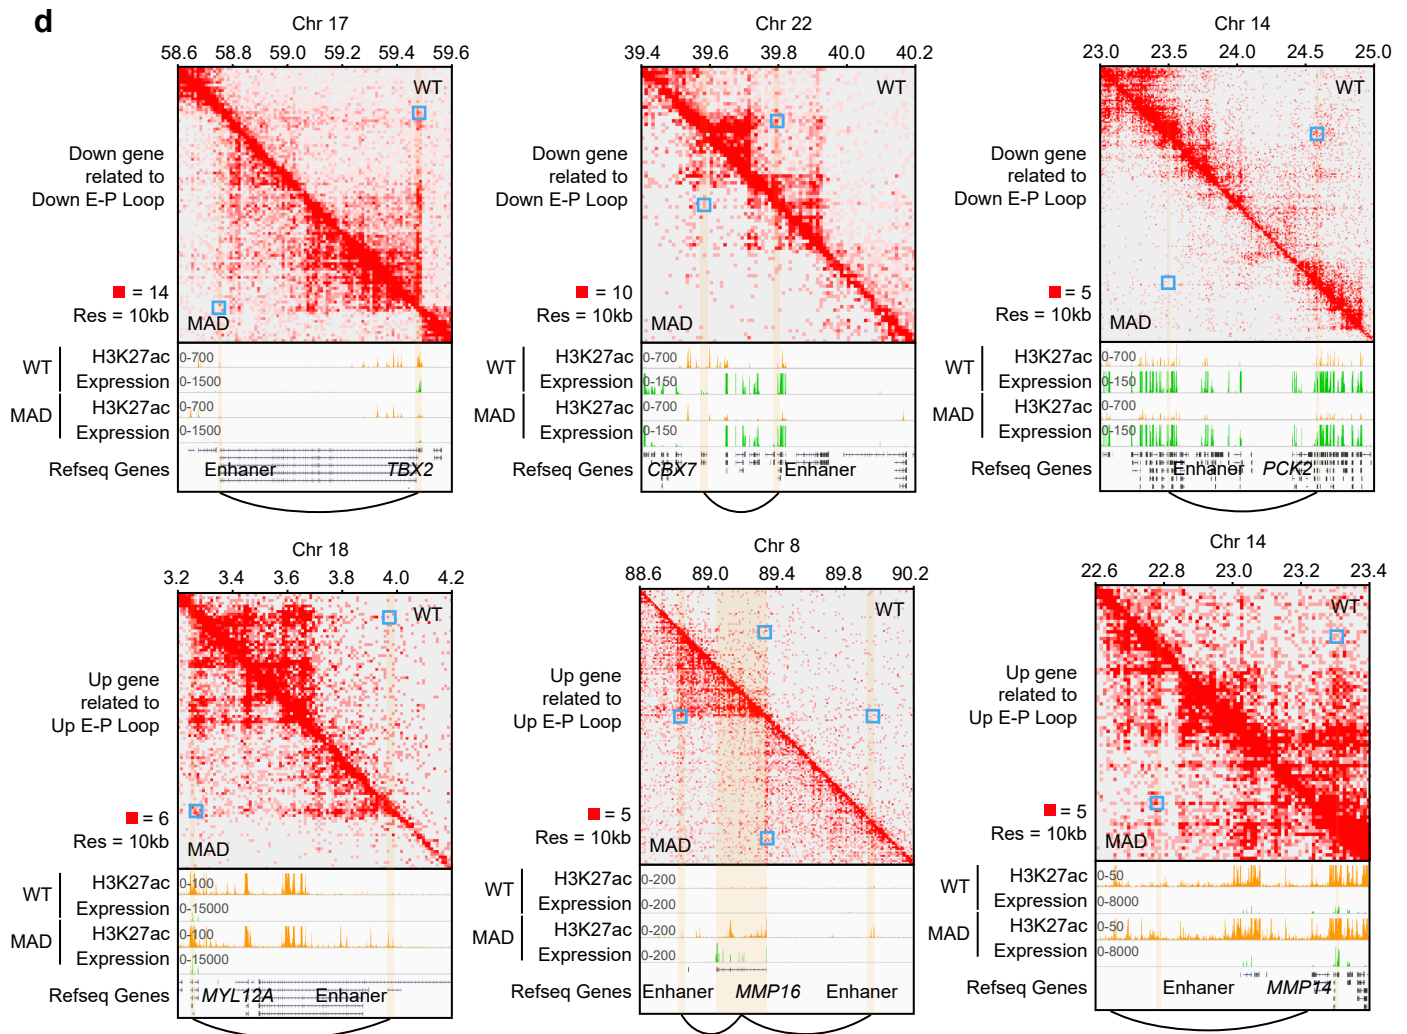

**Supplementary Fig. 17| Altered chromatin E-P loops dysregulate aging-associated genes.**

a, Heatmap of dysregulated genes expression in altered chromatin E-P loops. b-c, Enriched pathways of dysregulated transcription in altered chromatin E-P loops. d, Representative dysregulation of geroprotection- and senescence-associate genes in altered chromatin E-P loop. All p-values were determined using the two-sided Wilcoxon rank-sum test.

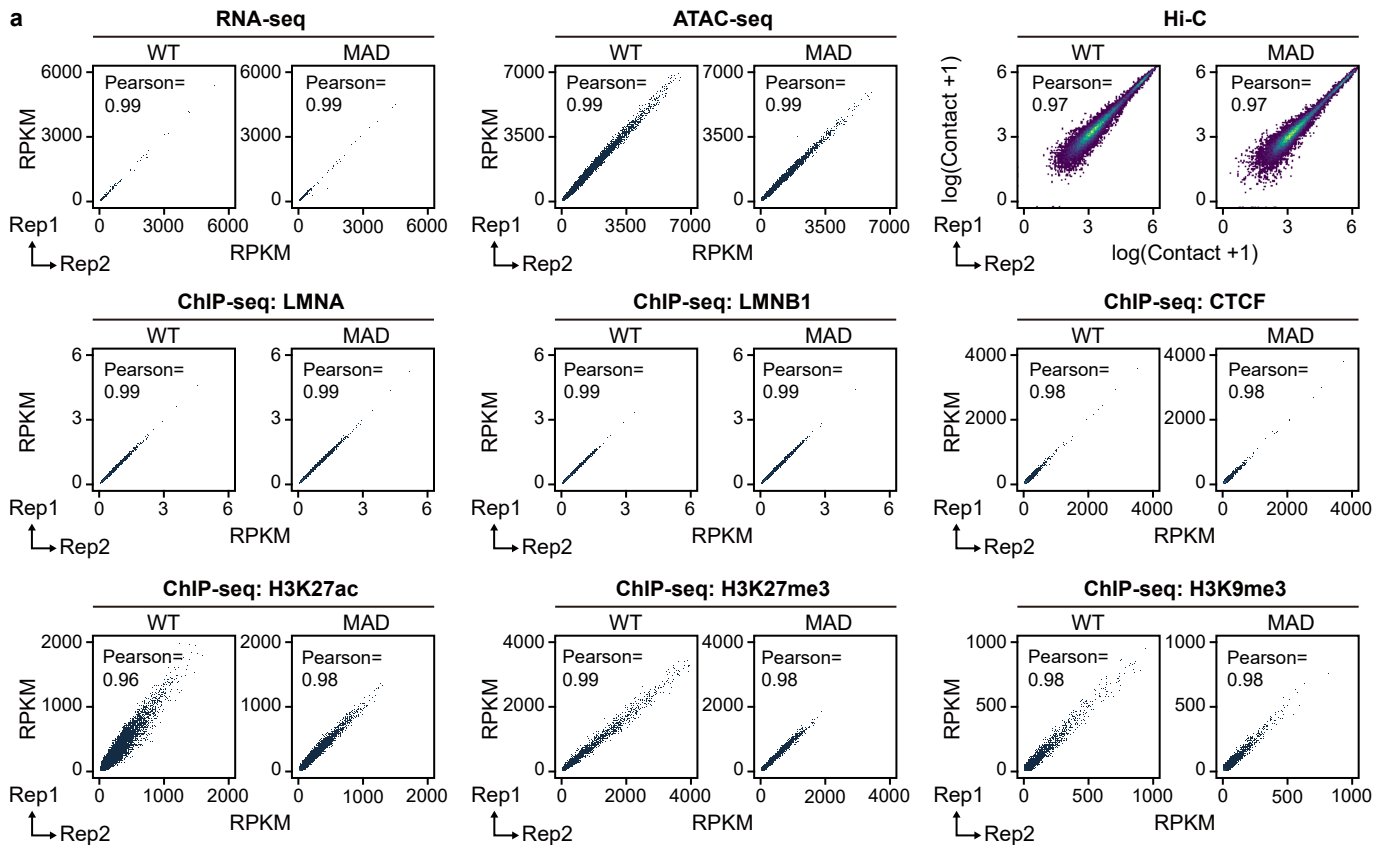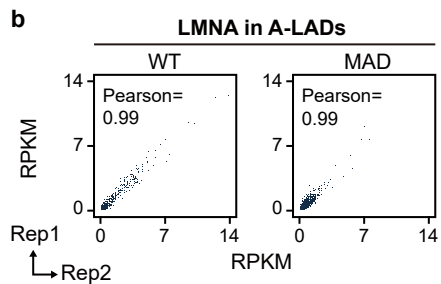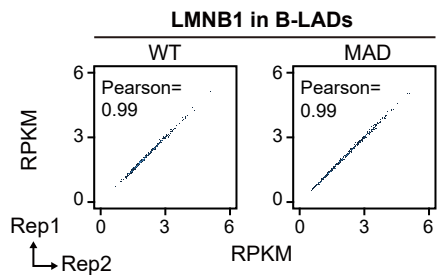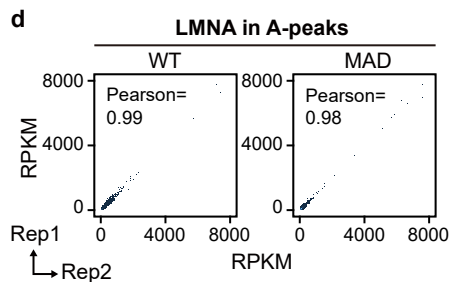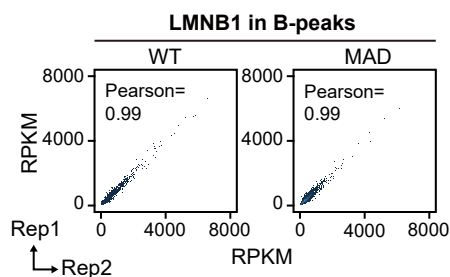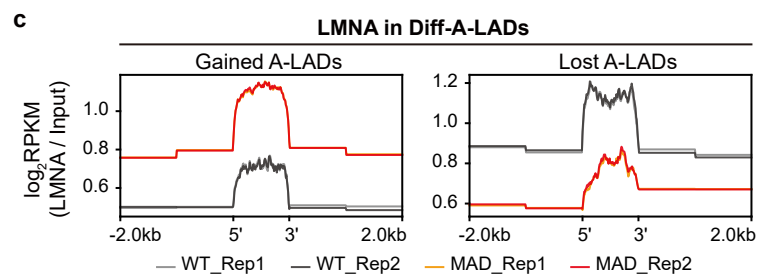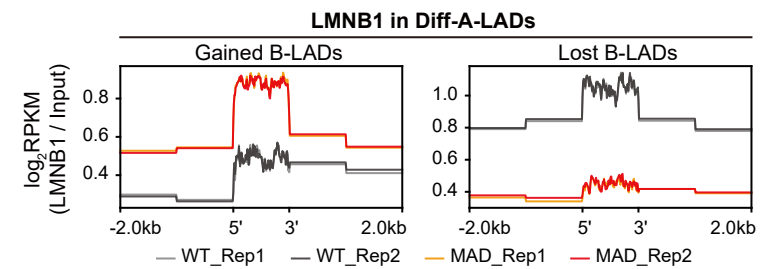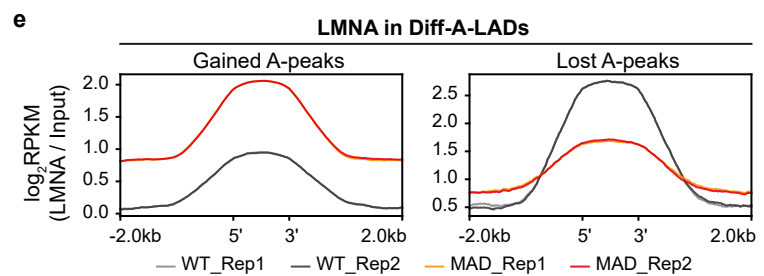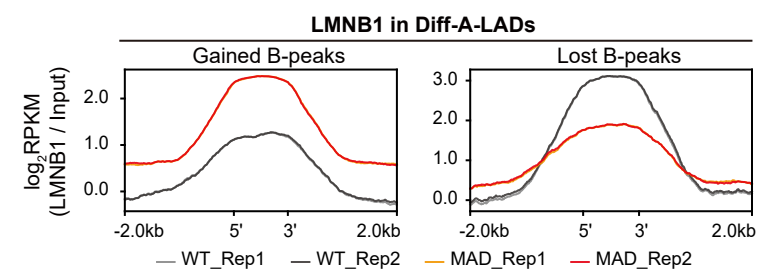



**Supplementary Fig. 18 | Similarity between replicates.** a, Scatter plots showing overall signal changes of indicated datasets. For RNA-seq, ATAC-seq and ChIP-seq, x- and y-axis values represented RPKM (reads per kilobase million mapped reads). For ATAC-seq and ChIP-seq of CTCF, H3K27ac, H3K27me3 and H3K9me3, quantifications were performed on the consensus peaks of the two replicates. For ChIP-seq of lamin A/C (LMNA) and lamin B1 (LMNB1), quantifications were performed on 100kb genomic bins. b, Scatter plots showing overall signal similarity between the two independent ChIP-seq for lamin A/C (LMNA) and lamin B1 (LMNB1) LADs. c, Average plots showing the Lamins signals in the differential LADs. Log<sub>2</sub>RPKM was calculated in 10kb-resolution. d, Scatter plots showing overall signal changes of indicated datasets. x- and y-axis values represented RPKM. Quantification was performed on the consensus A-/B-peaks of two replicates. e, Average plots showing the Lamins signals in the differential Lamin-peaks. Log<sub>2</sub>RPKM was calculated in 1kb-resolution. All p-values were determined using the two-sided Wilcoxon rank-sum test.

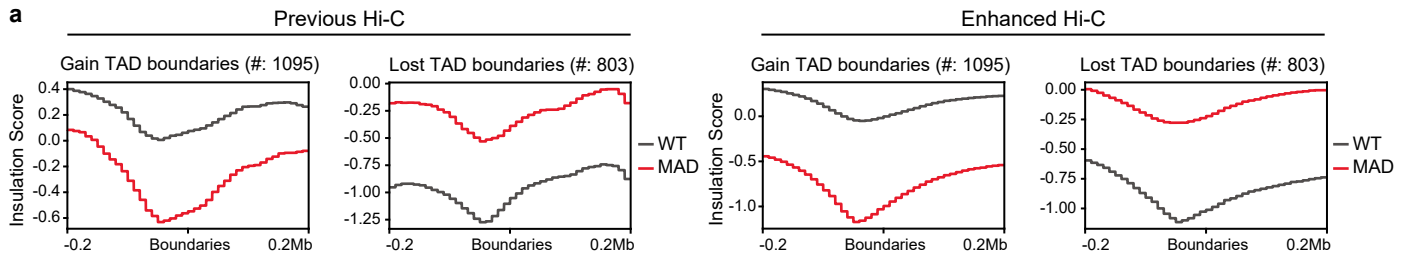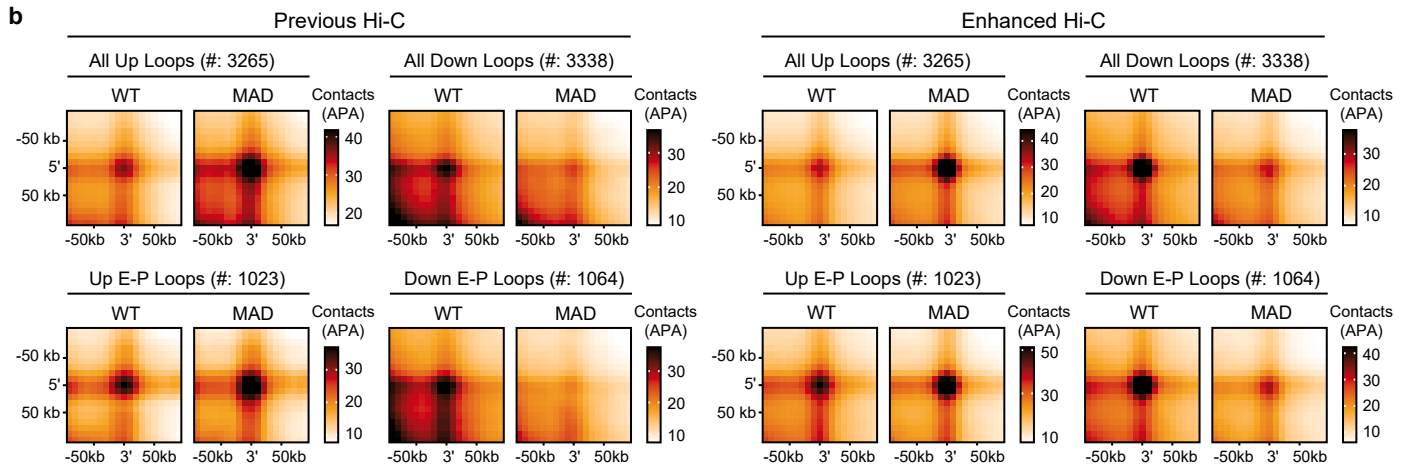

**Supplementary Fig. 19 | Validation of differential TADs and loops with enhanced Hi-C**

**data.** a, Average plots of insulation scores around differential TAD boundaries. The insulation scores were calculated by GENOVA at 10kb resolution. Lower insulation score represented stronger TAD insulation. b, APA analysis at 10 kb resolution showing the contacts of the indicated interactions in the indicated groups.

NSCs

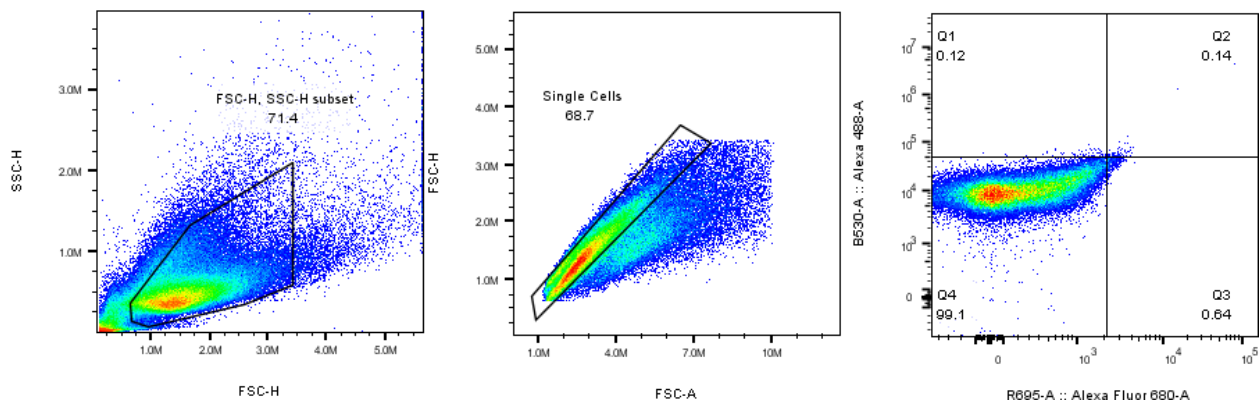

VSMCs

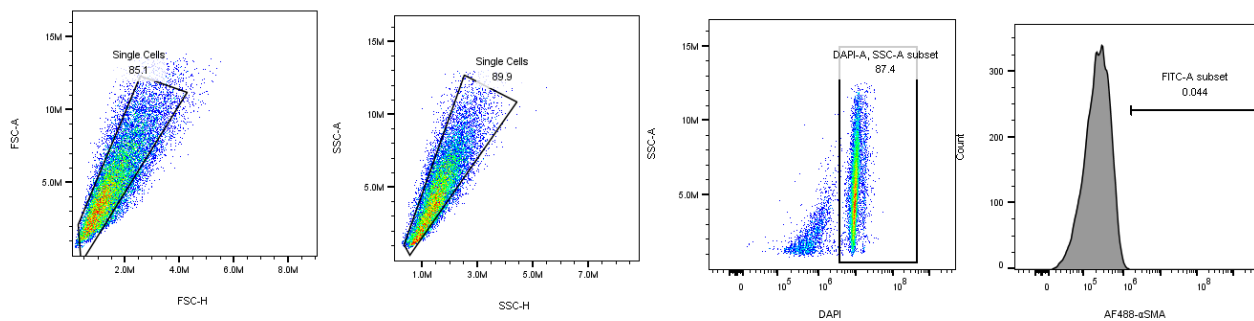

VECs

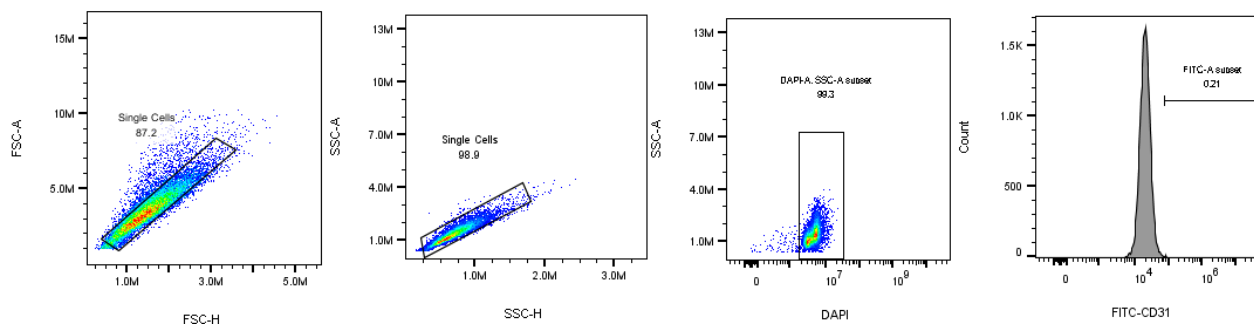

MSCs

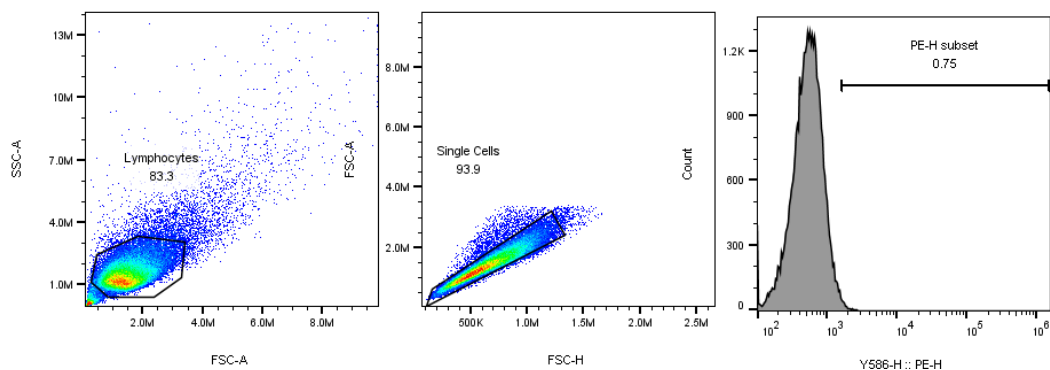

**Supplementary Fig. 20| Gating strategy of flow cytometry for NSCs, VSMCs, VECs and MSCs.**

Figure 1d, LMNA and  $\beta$ -Actin

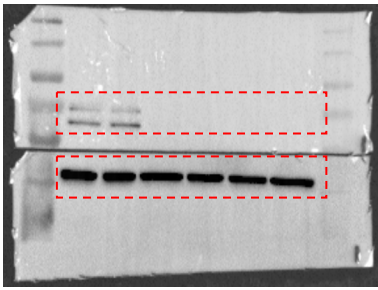

Figure 1d, EMERIN and HP1a

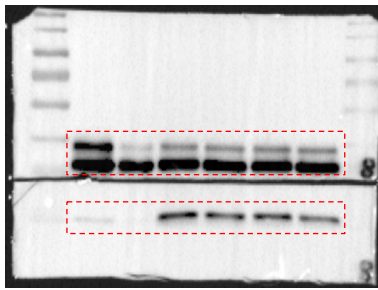

Figure 1d, Ku70 and  $\beta$ -Actin

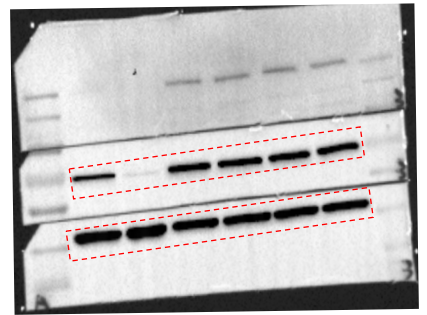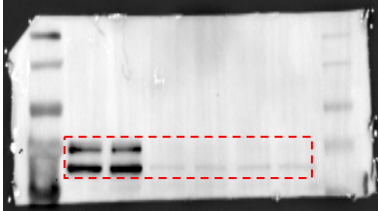

Figure 1d, LMNB1 and  $\beta$ -Actin

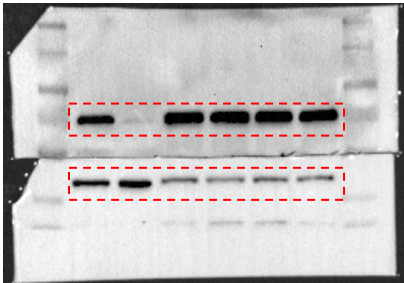

Figure 1d, LMNB2 and  $\beta$ -Actin

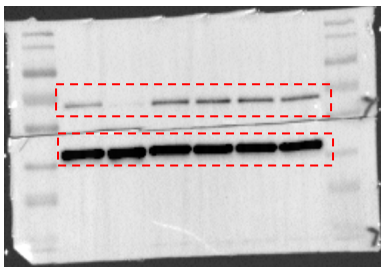

Figure 1d, LAP2

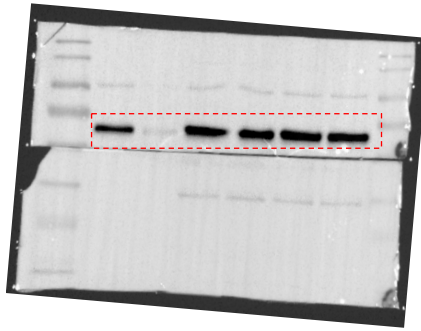

Figure 1d, FOX3A and  $\beta$ -Actin

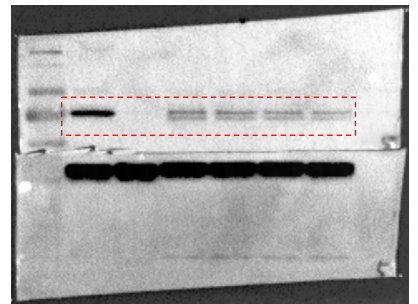

Figure 1d, WRN and  $\beta$ -Actin

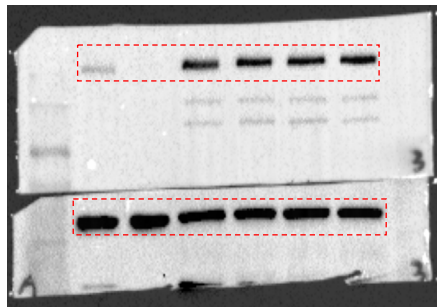

Figure 1d, HADC2 and  $\beta$ -Actin

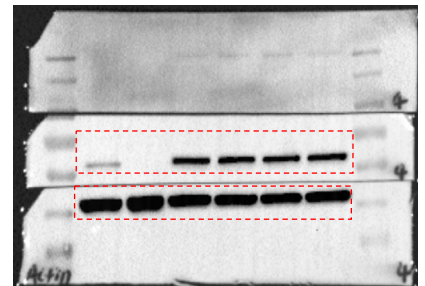

Supplementary Figure 1d, Lamin A/C and  $\beta$ -Actin

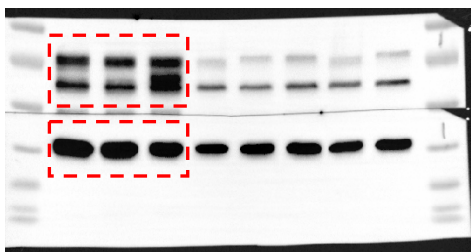

Supplementary Figure 1h, p16,p21 and  $\beta$ -Actin

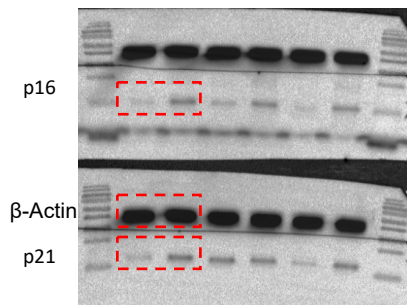

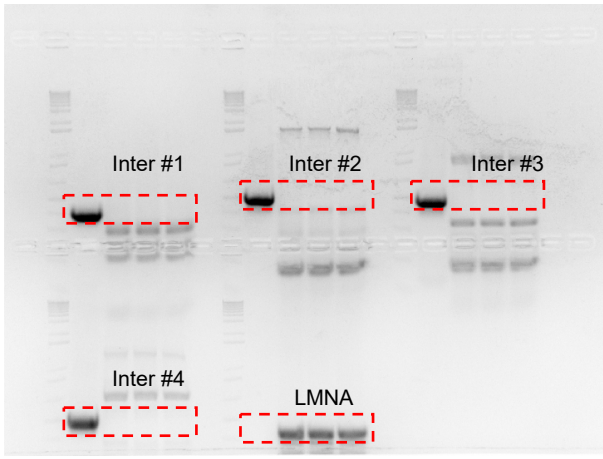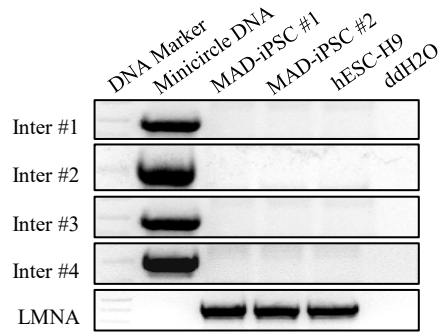

Long-time exposure

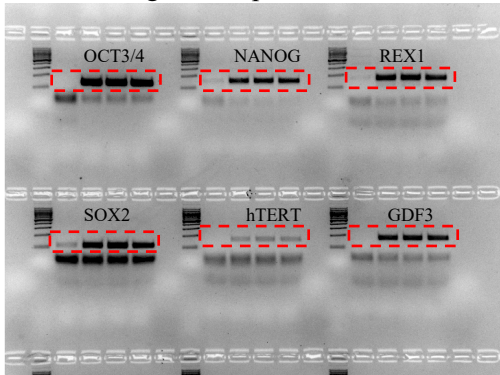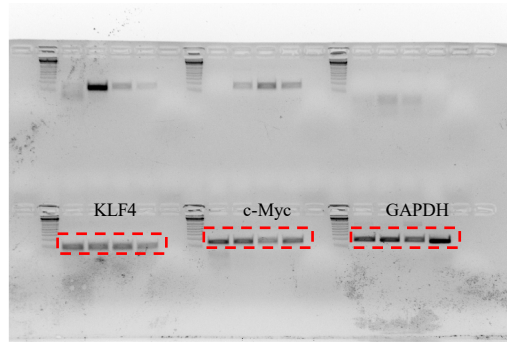

Short-time exposure

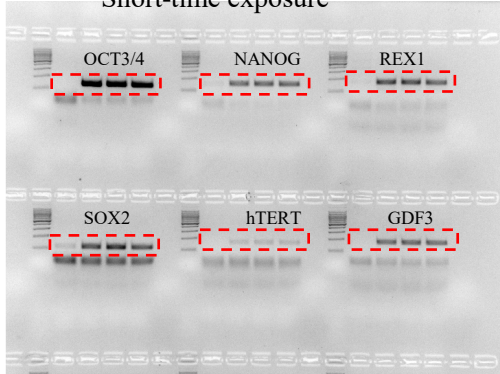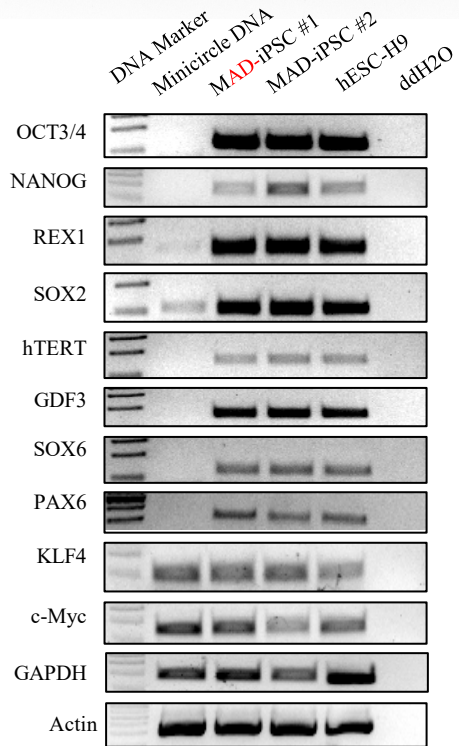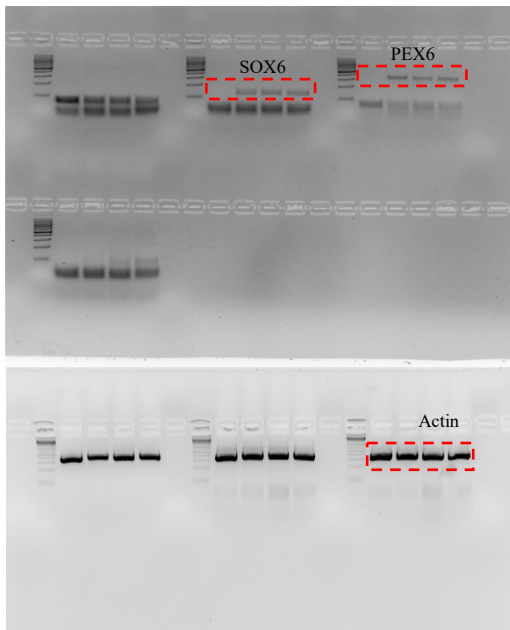

**Supplementary Fig. 21| Unprocessed gel for WB and DNA.**
