# Supplementary material for: Disorganized chromatin hierarchy and stem cell aging in a male patient of atypical laminopathy-based progeria mandibuloacral dysplasia type A
Source: PubMed Central journal article supplement — Nat Commun. 2024 Nov 20;15:10046. doi: 10.1038/s41467-024-54338-3 (PMC11579472; doi:10.1038/s41467-024-54338-3), 2024-11-20
Supplement: 41467_2024_54338_MOESM3_ESM.pdf [file 41467_2024_54338_MOESM3_ESM.pdf]

## Description of Additional Supplementary Files

### **Supplementary Data Legends**

**Supplementary Data 1. Sequence of oligos used in this study.**

**Supplementary Data 2. Antibodies used in this study.**

**Supplementary Data 3. Differentially expressed genes MAD-MSCs vs WT-MSCs.** Passage 9 of WT-MSCs and MAD-MSCs were subjected for RNA-seq and summary of differentially expressed genes ( $\log_2$  |Fold change|  $\geq 1$ , FDR < 0.05). All p-values were determined by edgeR with default parameters, and adjusted for multiple testing using the Benjamini-Hochberg method.

**Supplementary Data 4. Differentially expressed genes associated with LADs reorganization.**

Integration of differentially expressed genes with LADs reorganization, including gained A-LADs, gained B-LADs, lost A-LADs and lost B-LADs ( $\log_2$  |Fold change|  $\geq 1$ , FDR < 0.05). All p-values were determined by edgeR with default parameters, and adjusted for multiple testing using the Benjamini-Hochberg method.

**Supplementary Data 5. Differentially expressed genes associated with non-LADs peaks reposition.**

Integration of differentially expressed genes with non-LADs peaks reposition, including gained A-LADs, gained B-LADs, lost A-LADs and lost B-LADs ( $\log_2$  |Fold change|  $\geq 1$ , FDR < 0.05). All p-values were determined by edgeR with default parameters, and adjusted for multiple testing using the Benjamini-Hochberg method.

**Supplementary Data 6. Summary of differential genes caused by A and B-type altered lamin-**

**chromatin interaction ( $\log_2$  |Fold change|  $\geq 1$ , FDR < 0.05).** All p-values were determined using the two-sided Wilcoxon rank-sum test.

**Supplementary Data 7. Statistical analysis of the HiC dataset quality.** All p-values were determined using the two-sided Wilcoxon rank-sum test.

**Supplementary Data 8. Differentially expressed genes associated with shortened TADs and altered**

**lamin-chromatin interaction.** Integration of differentially expressed genes with shortened TADs and altered lamin-chromatin interaction ( $\log_2$  |Fold change|  $\geq 1$ , FDR < 0.05). All p-values were determined by edgeR with default parameters, and adjusted for multiple testing using the Benjamini-Hochberg method.

**Supplementary Data 9. Summary of annotated chromatin loops, E-P loop and differentially expressed genes.** Integration of differentially expressed genes with chromatin loop level alterations ( $\log_2$  |Fold change|  $\geq 1$ , FDR < 0.05). All p-values were determined by edgeR with default parameters, and adjusted for multiple testing using the Benjamini-Hochberg method.
